# Supplementary material
Source: publisher site journal article supplement (https://www.dovepress.com/article/254747)
Supplement: Supplementary file 1 [file get_supplementary_file.php]

## **Supplementary figure and table legends**

**Figure S1. Schematic overview of study design and data analysis.** The information of patients, samples and sequencing technology was indicated in red, blue and green colors respectively.

**Figure S2. Genetic mutations associated with platinum response identified in patients received platinum-based chemotherapy only. (A)** The VAF of TP53 mutation in responders and non-responders ( $P=0.026$ ). **(B)** Types of TP53 mutation detected only in responders (green), only in non-responders (red), and common in both responders and non-responders (grey). **(C)** and **(D)** Locations of mutation sites in KRAS and EGFR genes. Mutation sites identified only in responders and non-responders was highlighted in green and red, respectively. Mutation sites common in both responders and non-responders were highlight in black. Green plots represent missense mutations and brown plots represent inframe InDel.

**Figure S3. Spectrum of somatic mutations shared in at least 2 pre-chemotherapy samples.**

**Figure S4. Spectrum of somatic mutations shared in at least 2 post-chemotherapy samples.**

**Figure S5. Mutational signatures correlated with platinum response.** (A) and (B) Distribution of mutational signatures of patient 1 (A) and patient 2 (B). (C) and (D) Venn diagram depicting shared mutational signatures detected only in pre (pre-chemotherapy) or only in post (post-chemotherapy) samples of patient 1 and patient 2. (E) Heatmap depicting shared mutational signatures detected in post-chemotherapy samples from another 9 patients. The depth of the color represents the proportion of this signature.

**Figure S6. Distribution of nucleotide changes of the somatic mutations identified from pre- and post-chemotherapy samples of patient 1 and patient 2.**

**Figure S7. GO and KEGG enrichment analysis.** (A) GO enrichment based on platinum-sensitive genes and platinum-resistance genes, respectively (green: cellular component; blue: biological process; red: molecular function). Green line and red line in the right represent the functions platinum-sensitive genes and platinum-resistance genes enriched in, respectively. (B) KEGG pathway analysis based on platinum-sensitive genes.

**Figure S8. TMB change in pre (pre-chemotherapy) and post (post-chemotherapy) samples derived from patient 2 (A), patient 3 (B), patient 1 (C) and patient 4 (D).**

**Figure S9. Validation of identified genes based on GDSC database. (A)**

The IC50 values of cisplatin in TP53-mutated cells was higher than TP53-wild type cells ( $P=0.018$ ). Dots represent different cancer cells. **(B)** The IC50 values of cisplatin in KRAS-mutated cells was higher than KRAS-wild type cells ( $P=8.5 \times 10^{-5}$ ). **(C)** The IC50 values of cisplatin in EGFR-mutated cells and EGFR-wild type cells had no significant statistic difference ( $P=0.23$ ).

**Table S1. The SNVs existed only in pre-chemotherapy samples.**

**Table S2. The SNVs existed only in post-chemotherapy samples.**

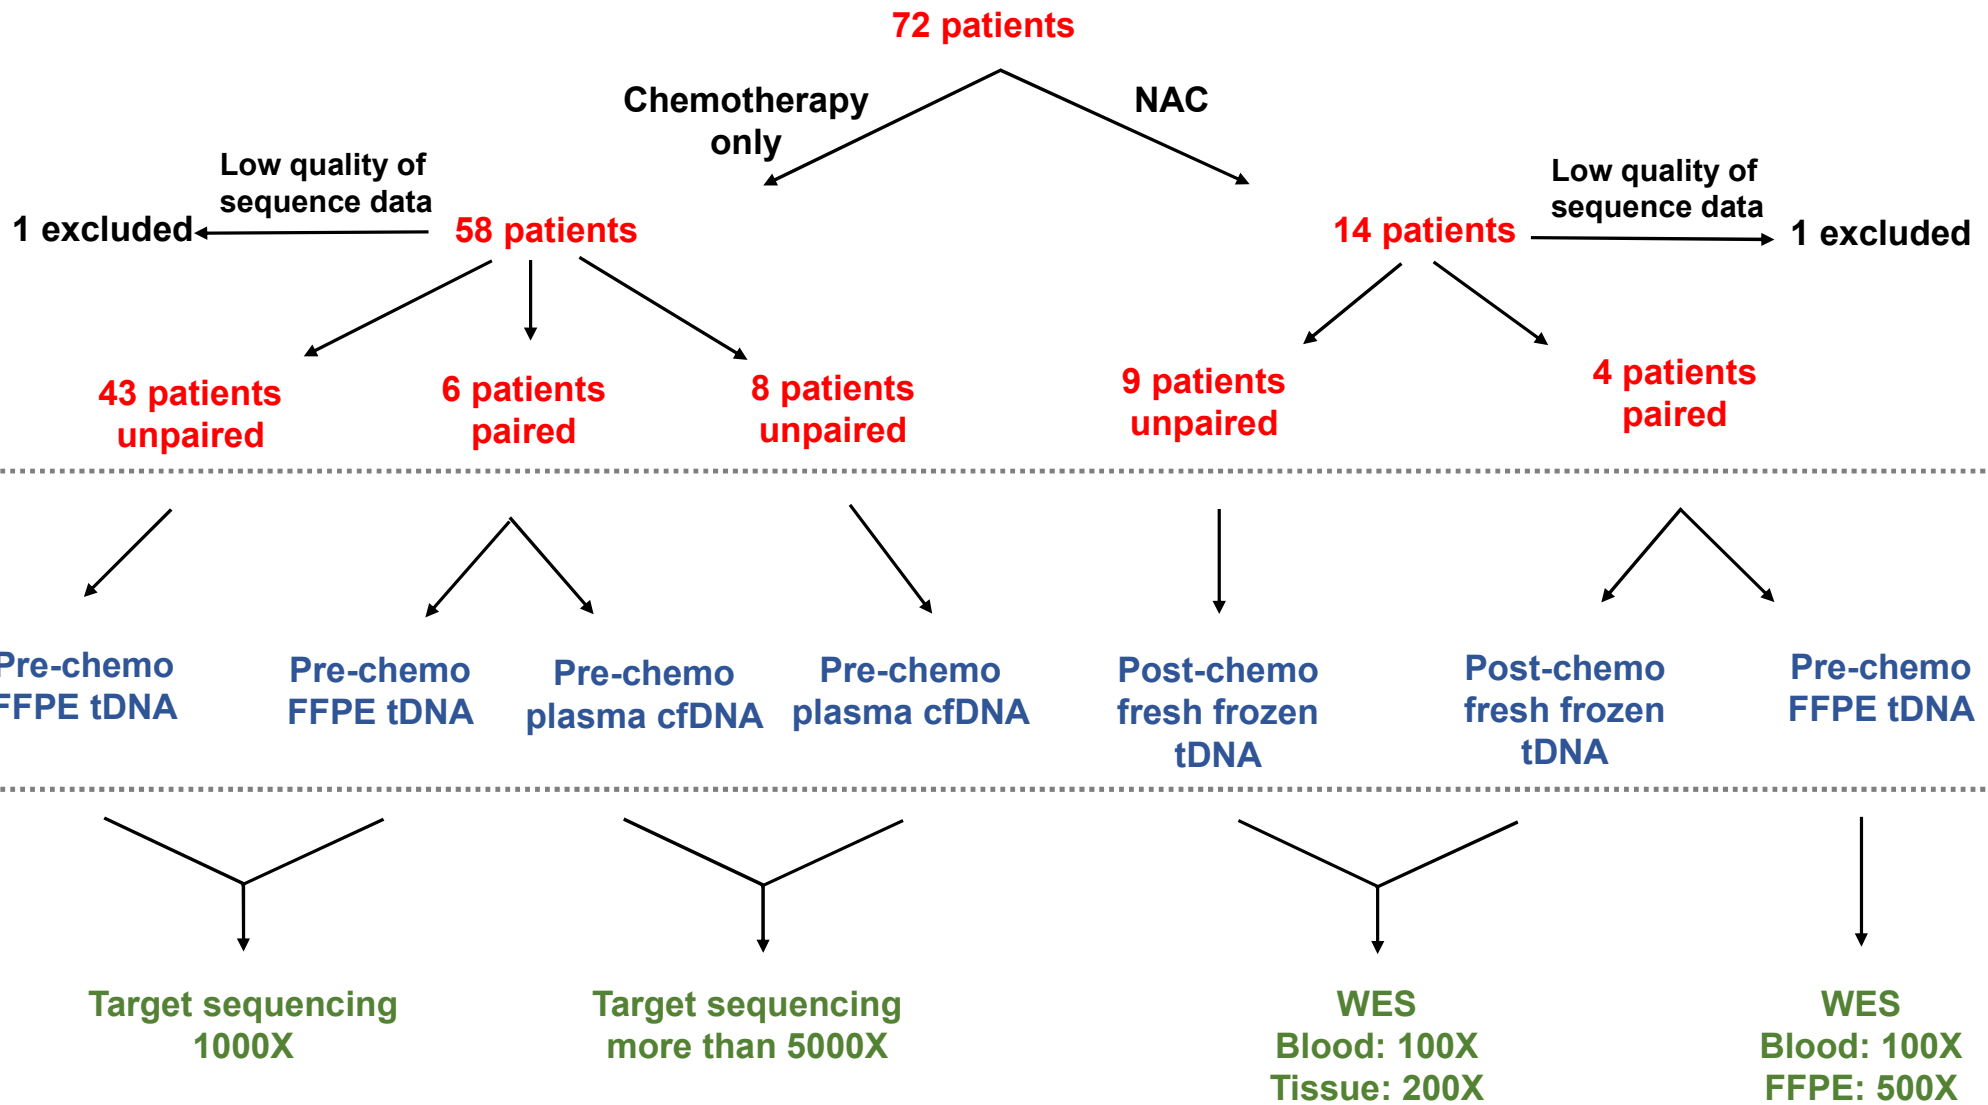

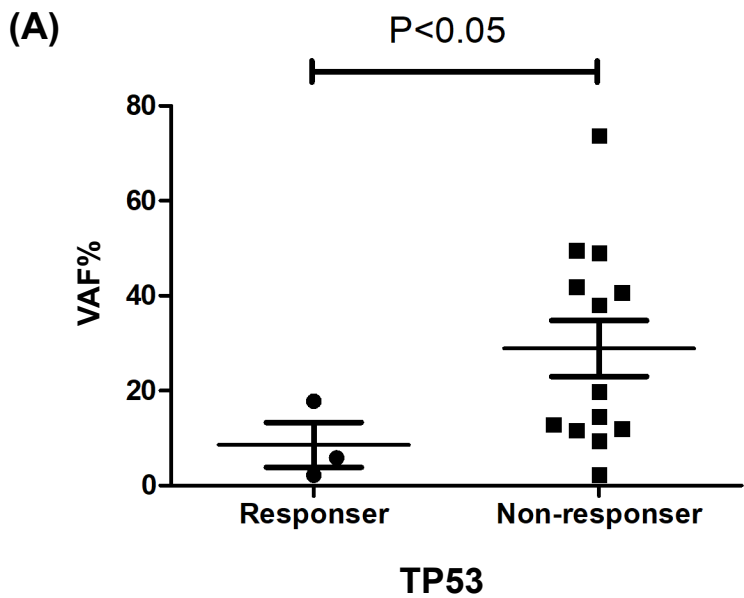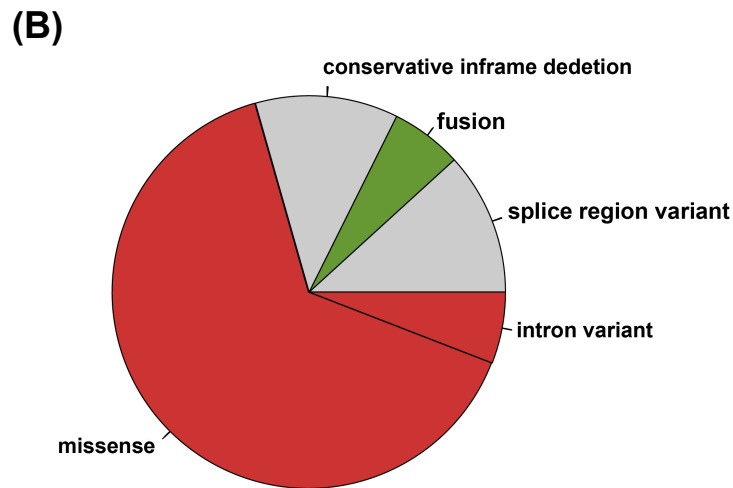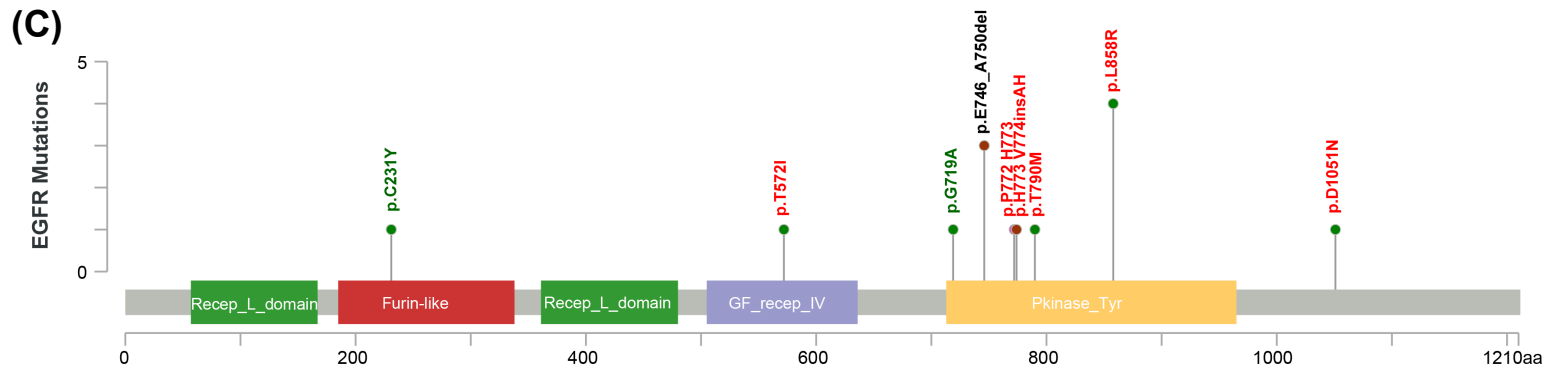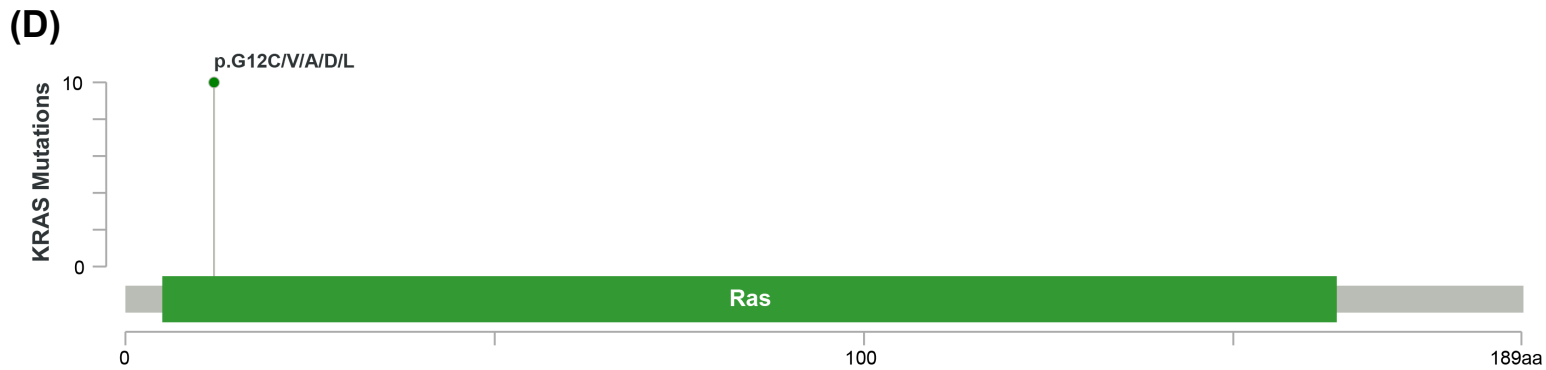



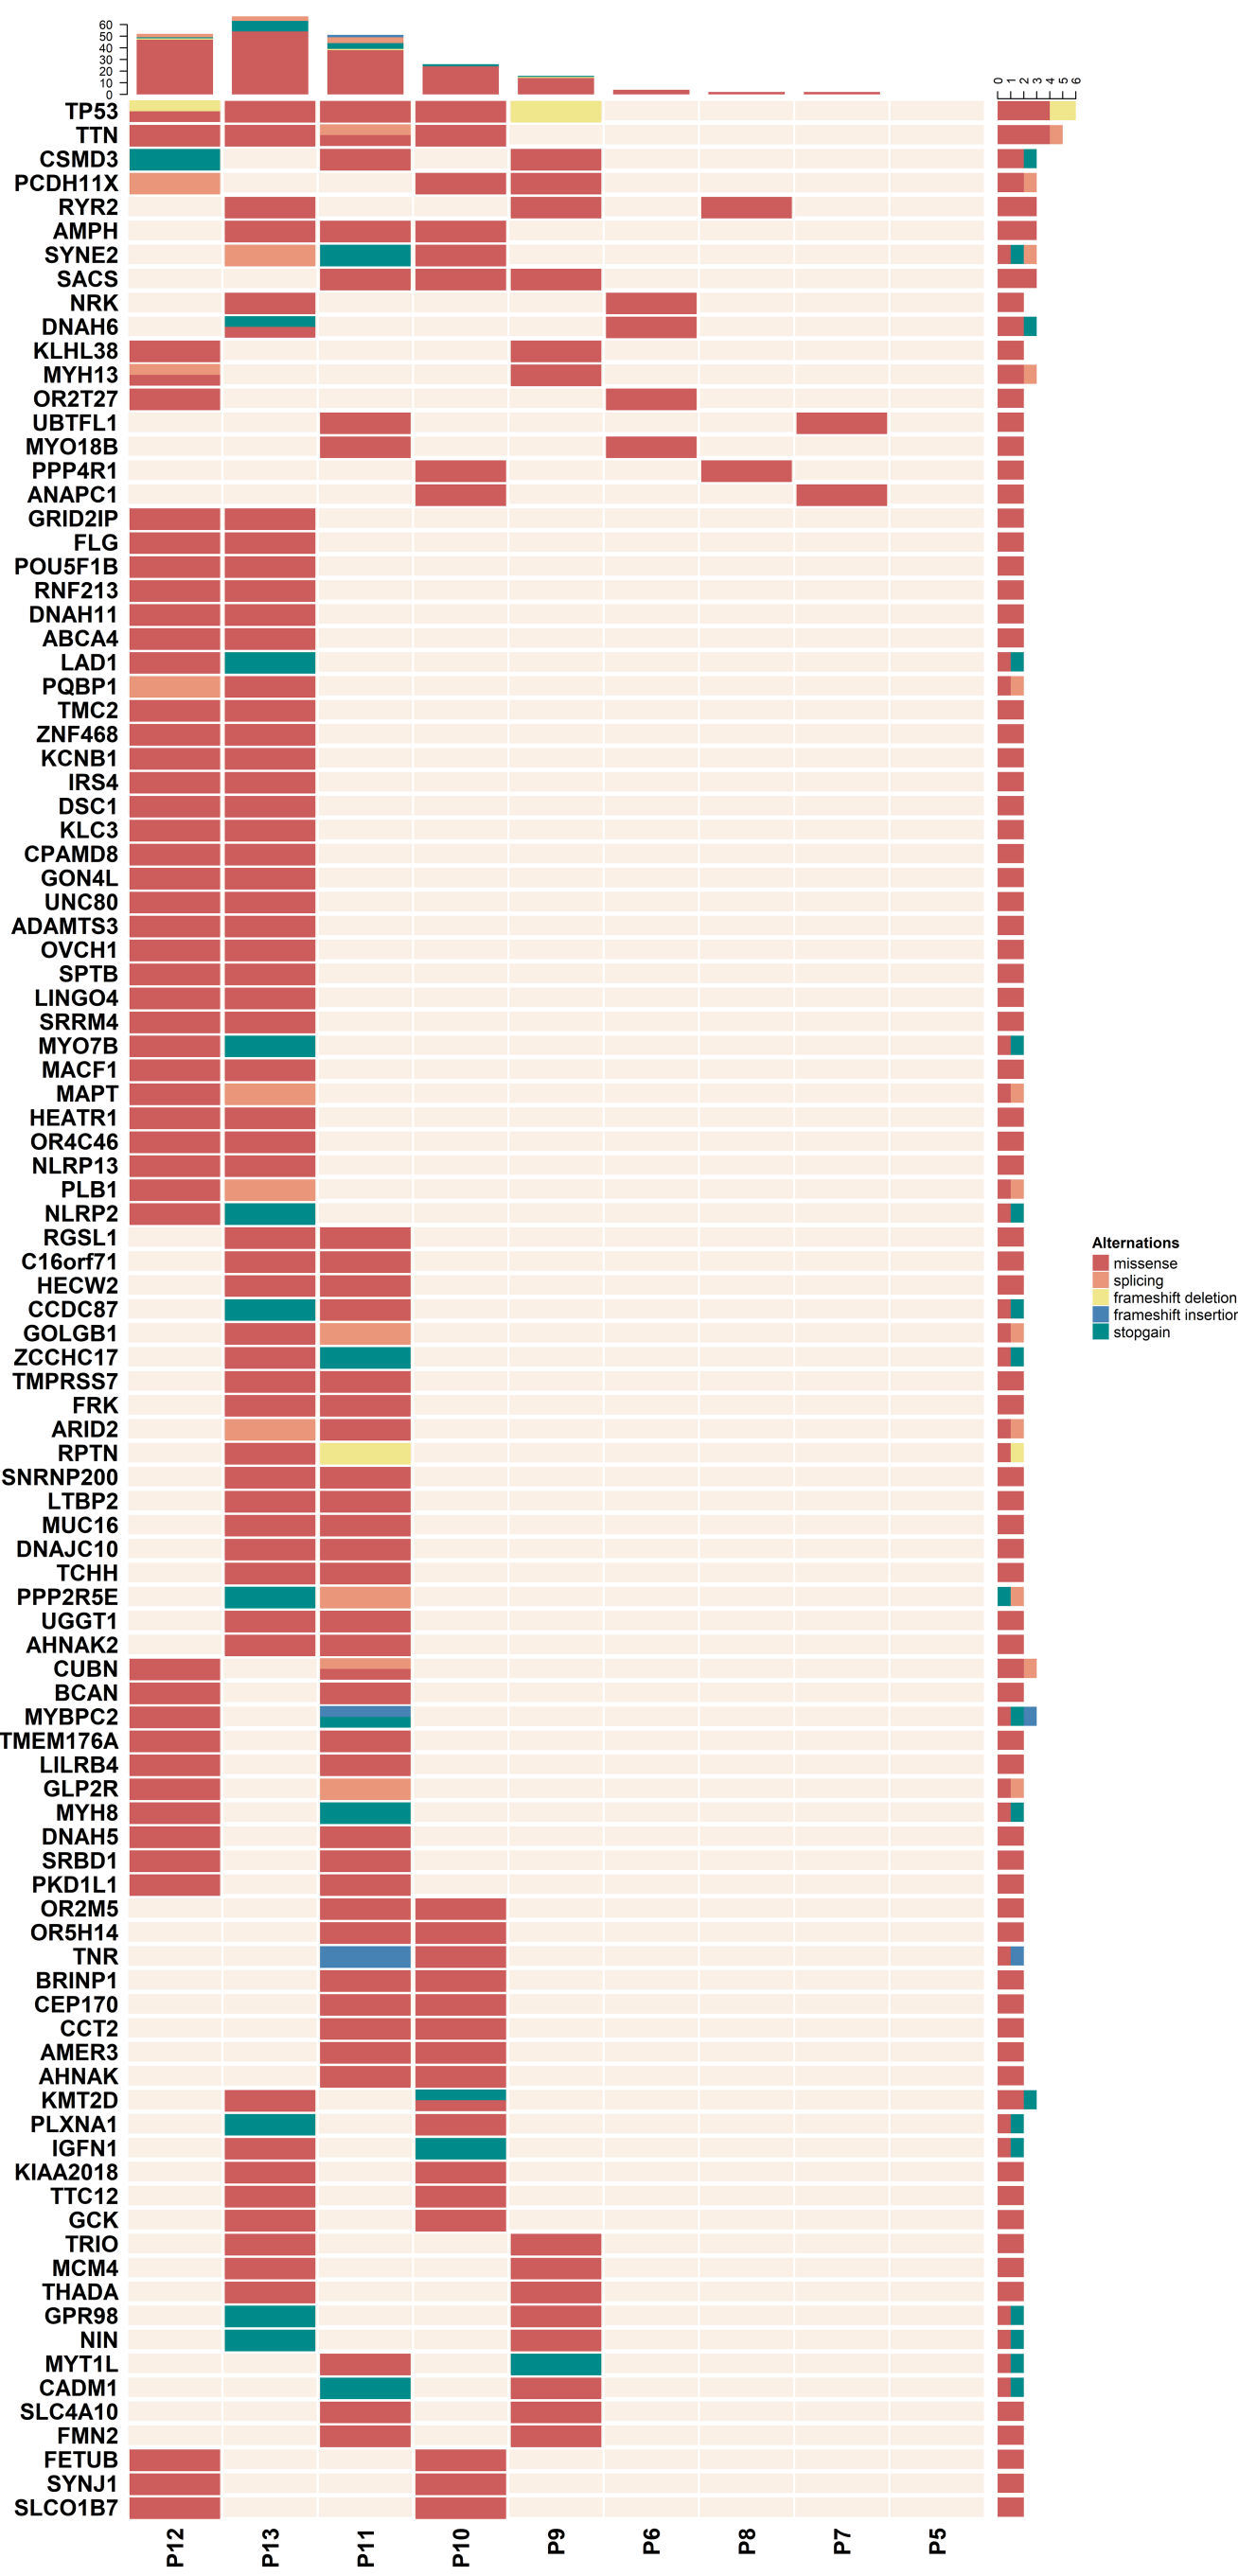





**(A)**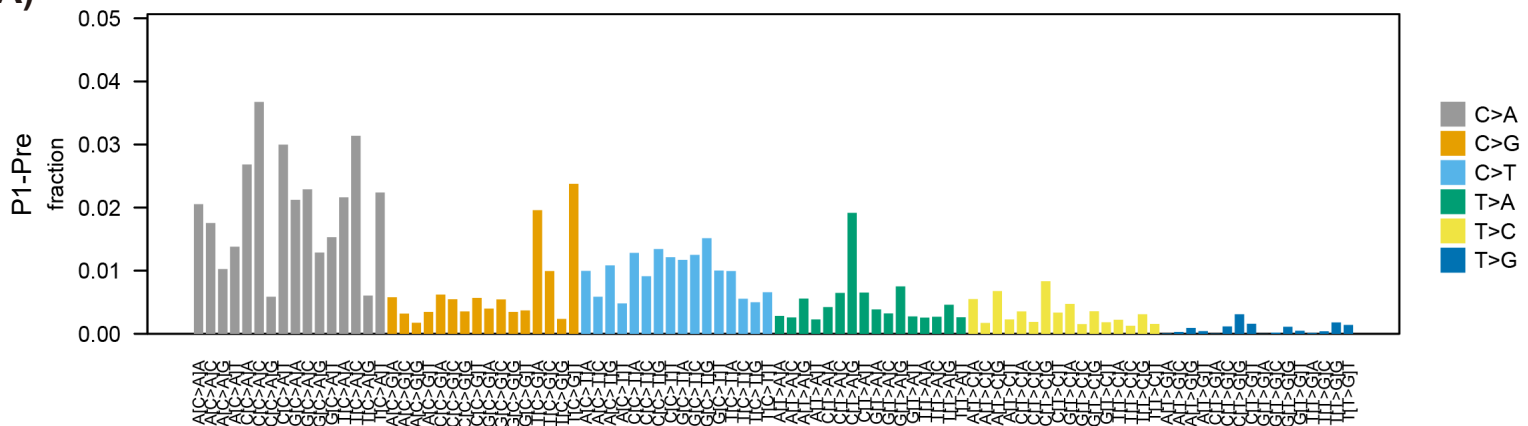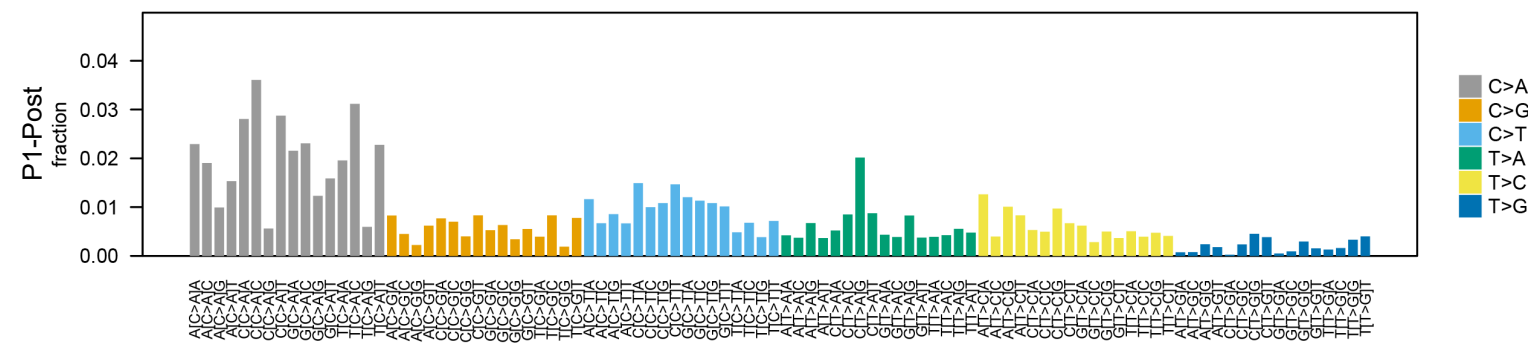**(B)**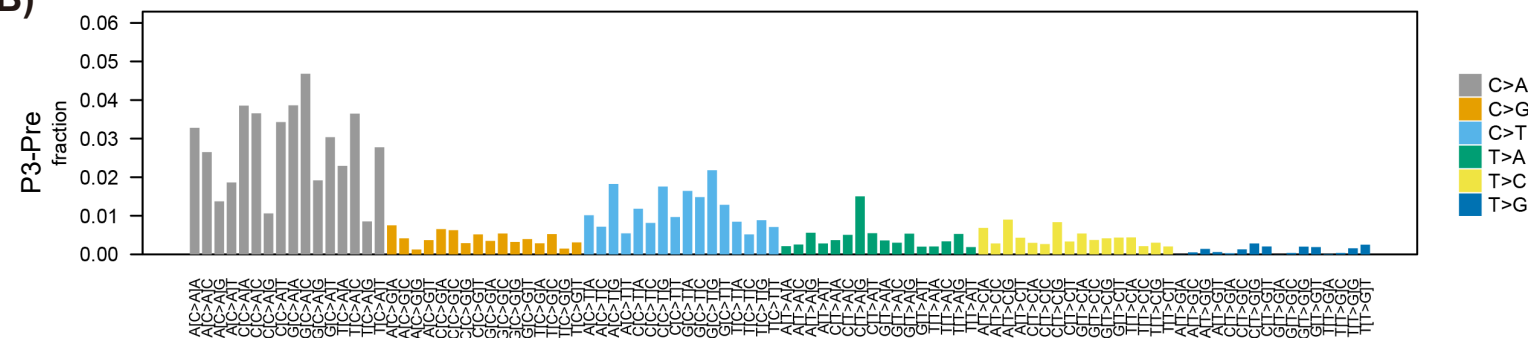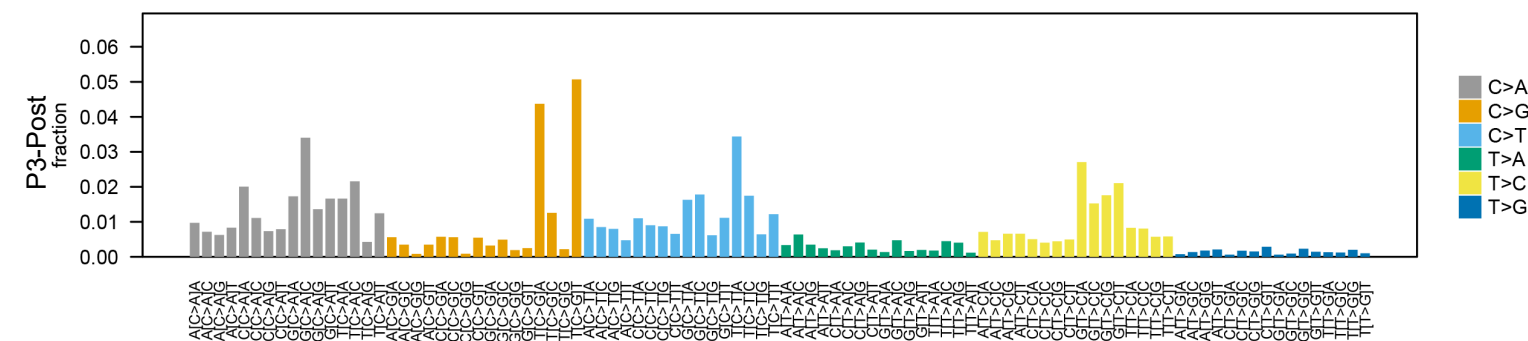

(A)

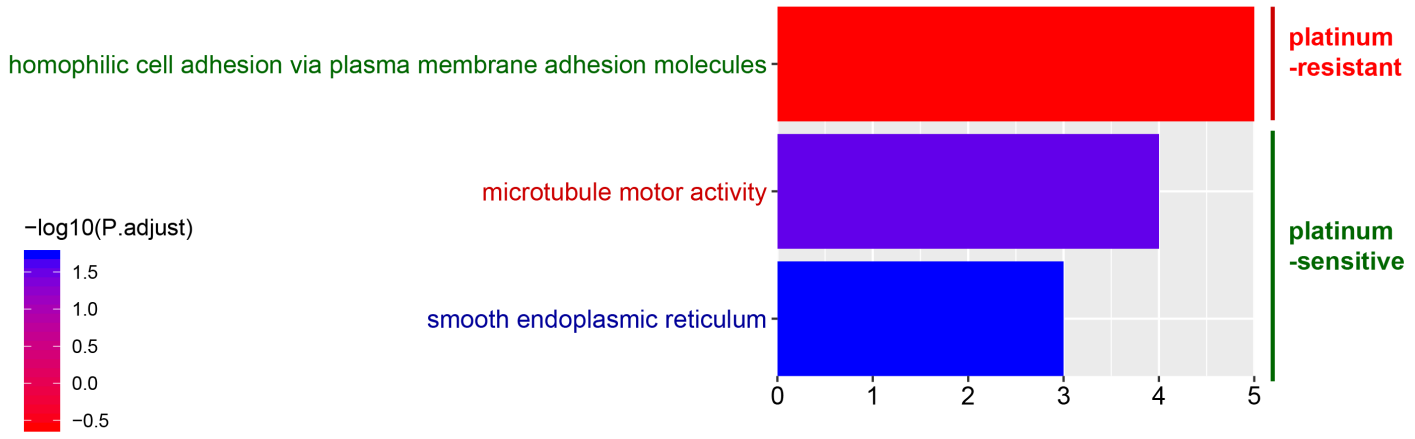

(B)

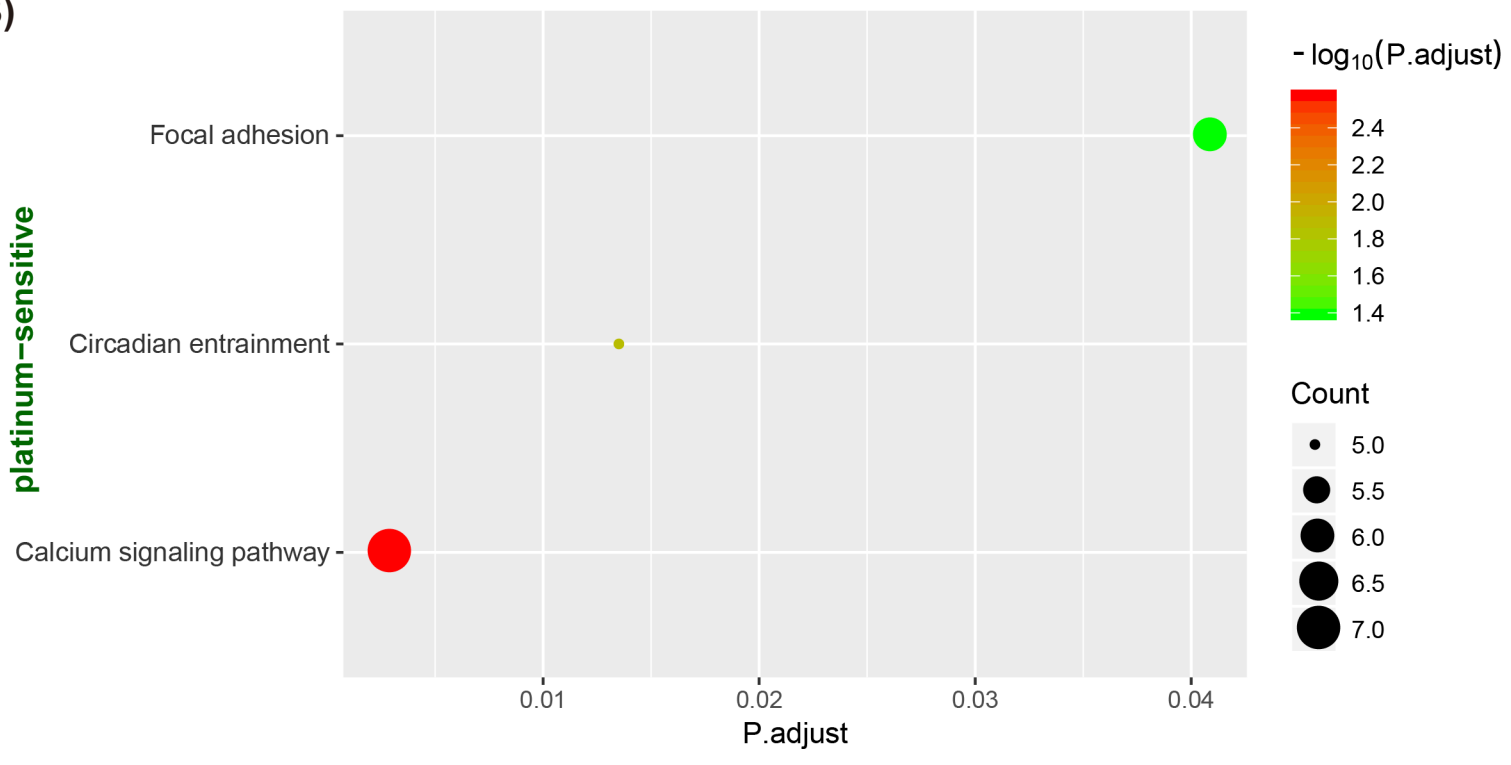

**(A)**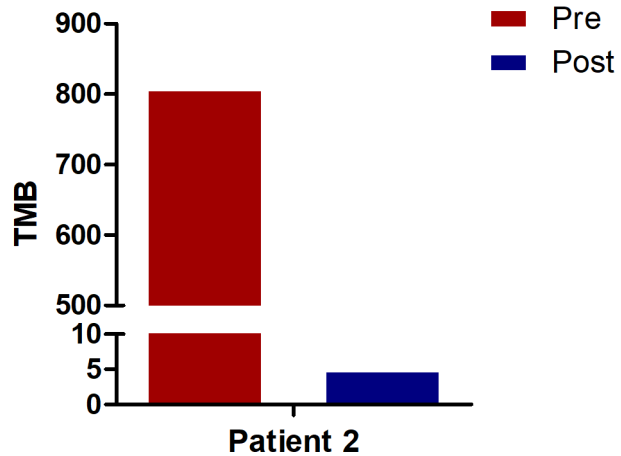**(B)**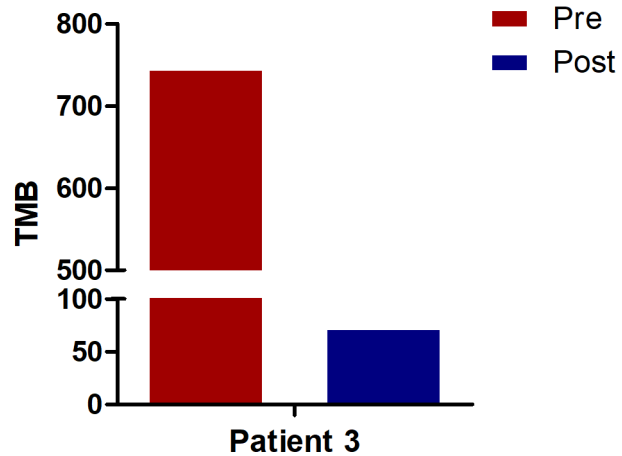**(C)**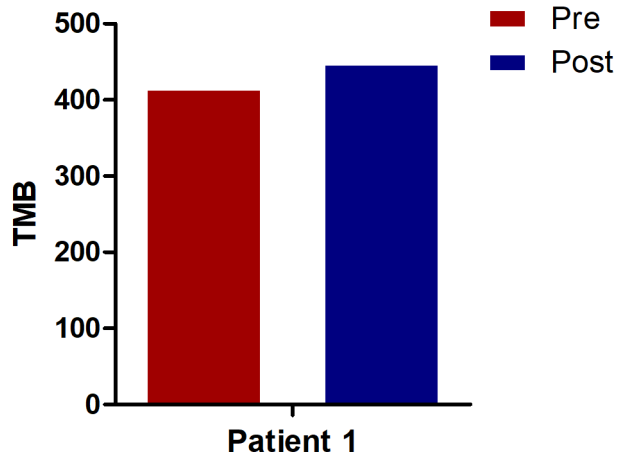**(D)**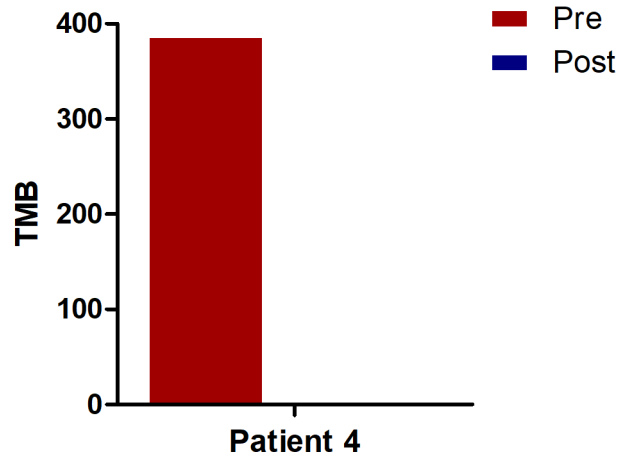

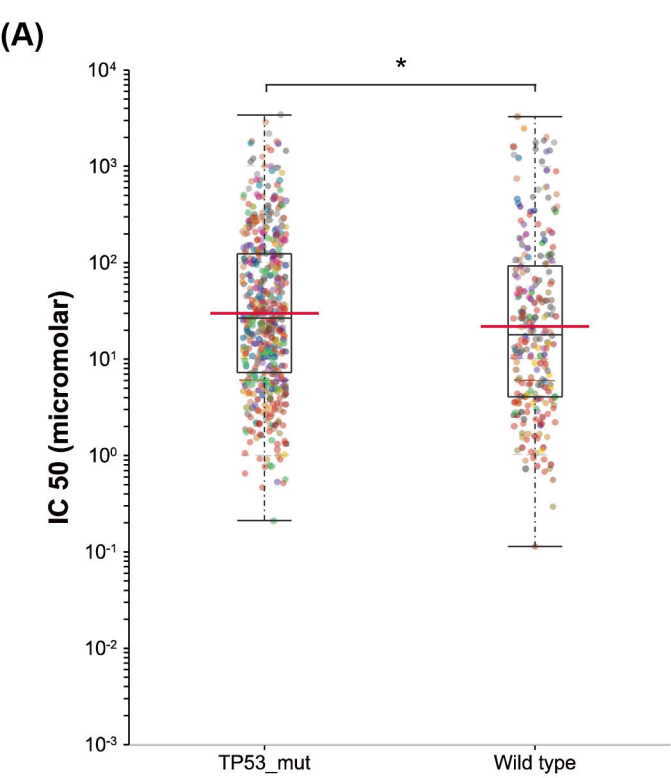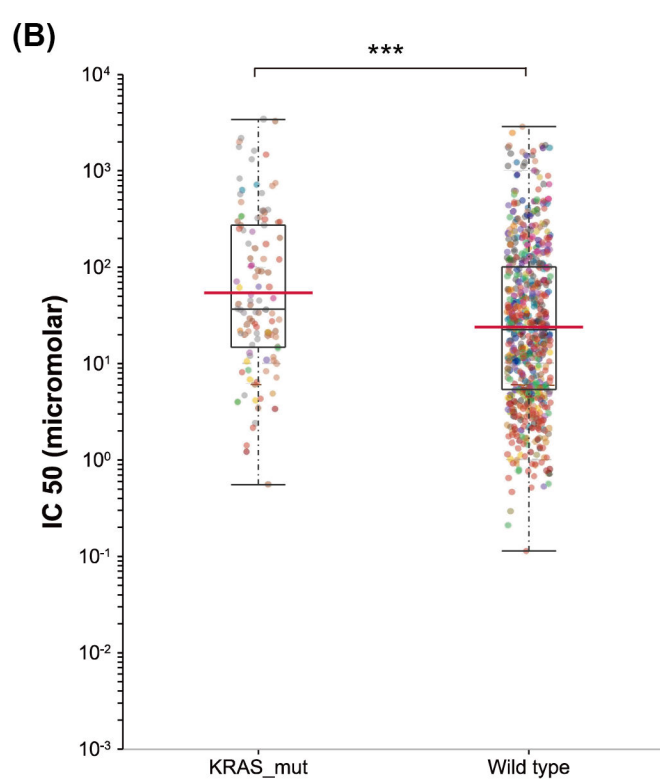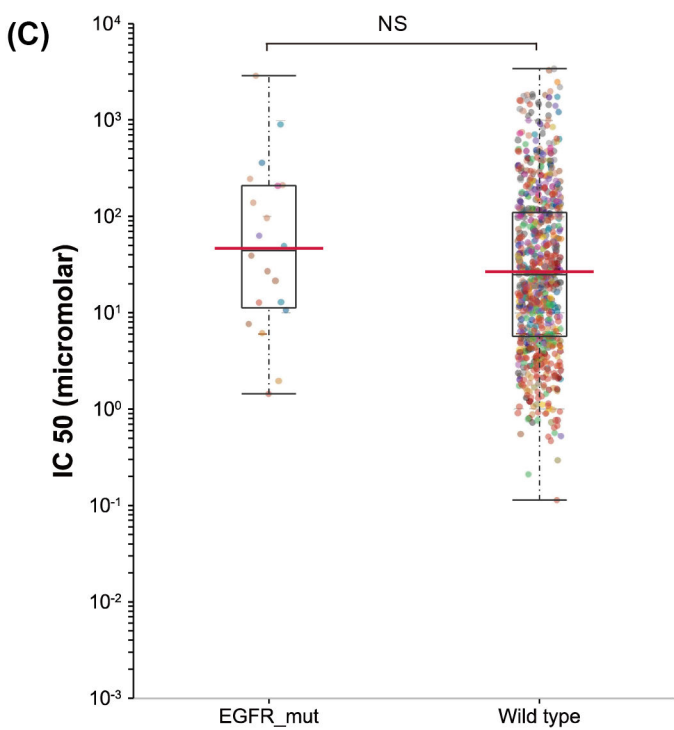

Table S1. The SNVs existed only in pre-chemotherapy samples

| Patient | Chromosome | Position  | Ref | Alt | GeneName | Mutation type | VAF   |
|---------|------------|-----------|-----|-----|----------|---------------|-------|
| P1      | 9          | 96278367  | C   | A   | FAM120A  | missense      | 0.357 |
| P1      | 11         | 64972286  | G   | C   | CAPN1    | missense      | 0.308 |
| P1      | 8          | 56015236  | G   | T   | XKR4     | missense      | 0.27  |
| P1      | 14         | 39706177  | G   | C   | MIA2     | missense      | 0.264 |
| P1      | 12         | 49448166  | C   | T   | KMT2D    | stopgain      | 0.24  |
| P1      | X          | 53283792  | C   | A   | IQSEC2   | missense      | 0.235 |
| P1      | X          | 77268502  | G   | C   | ATP7A    | missense      | 0.217 |
| P1      | 15         | 33765723  | C   | A   | RYS3     | missense      | 0.207 |
| P1      | 3          | 97806764  | G   | T   | OR5AC2   | missense      | 0.206 |
| P1      | 2          | 40657031  | C   | G   | SLC8A1   | missense      | 0.2   |
| P1      | X          | 149642019 | A   | G   | MAMLD1   | missense      | 0.19  |
| P1      | 5          | 80785097  | G   | A   | SSBP2    | missense      | 0.189 |
| P1      | 19         | 17644465  | C   | T   | FAM129C  | stopgain      | 0.162 |
| P1      | 19         | 49878115  | G   | A   | DKKL1    | missense      | 0.16  |
| P1      | 17         | 4495740   | G   | A   | SMTNL2   | missense      | 0.158 |
| P1      | 12         | 49448169  | G   | T   | KMT2D    | missense      | 0.154 |
| P1      | 19         | 49878196  | G   | A   | DKKL1    | missense      | 0.154 |
| P1      | 19         | 4324658   | T   | G   | STAP2    | missense      | 0.148 |
| P1      | 19         | 43019171  | T   | C   | CEACAM1  | missense      | 0.133 |
| P1      | 5          | 178578171 | A   | T   | ADAMTS2  | missense      | 0.129 |
| P1      | 19         | 10398859  | G   | C   | ICAM4    | stoploss      | 0.122 |
| P1      | 17         | 2203167   | T   | G   | SMG6     | missense      | 0.118 |
| P1      | 19         | 10091320  | T   | A   | COL5A3   | splicing      | 0.118 |
| P1      | 1          | 229772693 | T   | G   | URB2     | missense      | 0.114 |
| P1      | 17         | 64961232  | G   | T   | CACNG4   | missense      | 0.111 |
| P1      | 7          | 158494554 | T   | C   | NCAPG2   | missense      | 0.107 |
| P1      | 17         | 7592168   | C   | G   | WRAP53   | missense      | 0.1   |
| P1      | X          | 78426988  | T   | C   | GPR174   | missense      | 0.093 |
| P1      | 6          | 7329448   | C   | G   | CAGE1    | missense      | 0.092 |
| P1      | 3          | 64580068  | C   | T   | ADAMTS9  | missense      | 0.089 |
| P1      | 9          | 35662251  | T   | C   | ARHGEF39 | missense      | 0.089 |
| P1      | 5          | 79029749  | A   | G   | CMYA5    | missense      | 0.085 |
| P1      | 6          | 30995786  | A   | G   | MUC22    | missense      | 0.085 |
| P2      | 9          | 27949023  | G   | C   | LINGO2   | missense      | 1     |
| P2      | 16         | 71602101  | G   | T   | TAT      | missense      | 1     |
| P2      | 3          | 19559555  | C   | G   | KCNH8    | missense      | 0.982 |

|    |    |           |   |   |          |          |       |
|----|----|-----------|---|---|----------|----------|-------|
| P2 | 17 | 10353861  | C | A | MYH4     | stopgain | 0.964 |
| P2 | 17 | 10353862  | C | A | MYH4     | missense | 0.964 |
| P2 | 4  | 2130939   | C | G | POLN     | missense | 0.958 |
| P2 | 19 | 10273377  | G | C | DNMT1    | missense | 0.958 |
| P2 | X  | 3261761   | C | G | MXRA5    | missense | 0.926 |
| P2 | 1  | 57756698  | G | A | DAB1     | missense | 0.917 |
| P2 | 10 | 68139093  | C | T | CTNNA3   | missense | 0.909 |
| P2 | X  | 140993452 | G | T | MAGEC1   | stopgain | 0.905 |
| P2 | 4  | 144620919 | G | T | FREM3    | missense | 0.904 |
| P2 | 18 | 22029820  | G | T | IMPACT   | missense | 0.867 |
| P2 | 1  | 231398557 | A | G | GNPAT    | missense | 0.846 |
| P2 | 5  | 140263375 | G | A | PCDHA13  | missense | 0.821 |
| P2 | 5  | 140175708 | T | A | PCDHA2   | missense | 0.815 |
| P2 | 12 | 43769928  | C | A | ADAMTS20 | missense | 0.81  |
| P2 | 16 | 74528729  | T | A | GLG1     | missense | 0.808 |
| P2 | 1  | 247875579 | G | T | OR6F1    | missense | 0.807 |
| P2 | 19 | 36896539  | A | T | ZFP82    | missense | 0.8   |
| P2 | 9  | 21971209  | T | C | CDKN2A   | splicing | 0.788 |
| P2 | 1  | 237791361 | C | A | RYR2     | missense | 0.741 |
| P2 | 5  | 140023490 | C | A | TMCO6    | missense | 0.733 |
| P2 | 2  | 179540701 | A | C | TTN      | missense | 0.725 |
| P2 | 1  | 180780606 | A | T | XPR1     | missense | 0.708 |
| P2 | 1  | 248128963 | G | T | OR2AK2   | missense | 0.708 |
| P2 | 2  | 179614685 | C | A | TTN      | missense | 0.705 |
| P2 | 7  | 92161866  | A | T | RBM48    | splicing | 0.688 |
| P2 | 3  | 8787342   | T | C | CAV3     | missense | 0.686 |
| P2 | 1  | 237947074 | T | G | RYR2     | stopgain | 0.667 |
| P2 | 9  | 140967938 | A | T | CACNA1B  | missense | 0.667 |
| P2 | 16 | 84922956  | G | T | CRISPLD2 | missense | 0.667 |
| P2 | 20 | 61981063  | G | A | CHRNA4   | missense | 0.667 |
| P2 | 20 | 62572332  | C | A | UCKL1    | stopgain | 0.667 |
| P2 | 11 | 22833534  | G | T | GAS2     | missense | 0.655 |
| P2 | 19 | 12541399  | C | A | ZNF443   | missense | 0.65  |
| P2 | 16 | 4714714   | A | G | MGRN1    | missense | 0.646 |
| P2 | 20 | 18523812  | G | A | SEC23B   | missense | 0.63  |
| P2 | 18 | 74627608  | A | T | ZNF236   | stopgain | 0.625 |
| P2 | 2  | 38301877  | G | A | CYP1B1   | missense | 0.616 |
| P2 | 6  | 10404861  | G | T | TFAP2A   | missense | 0.615 |

|    |    |           |   |   |          |          |       |
|----|----|-----------|---|---|----------|----------|-------|
| P2 | 3  | 69097224  | G | C | TMF1     | missense | 0.6   |
| P2 | 7  | 147336378 | C | A | CNTNAP2  | stopgain | 0.6   |
| P2 | 2  | 50573890  | G | T | NRXN1    | missense | 0.578 |
| P2 | 8  | 146067558 | C | A | ZNF7     | missense | 0.575 |
| P2 | 7  | 110763817 | T | A | LRRN3    | missense | 0.571 |
| P2 | 19 | 23328724  | T | A | ZNF730   | missense | 0.571 |
| P2 | 8  | 118159312 | C | T | SLC30A8  | missense | 0.56  |
| P2 | 1  | 27098999  | G | T | ARID1A   | stopgain | 0.558 |
| P2 | 5  | 140810778 | G | T | PCDHGA12 | missense | 0.541 |
| P2 | 1  | 207881592 | G | C | CR1L     | missense | 0.538 |
| P2 | 5  | 61661070  | G | T | KIF2A    | stopgain | 0.538 |
| P2 | 12 | 40953091  | G | T | MUC19    | splicing | 0.538 |
| P2 | 18 | 30350500  | G | C | KLHL14   | missense | 0.53  |
| P2 | 14 | 103571385 | A | T | EXOC3L4  | missense | 0.527 |
| P2 | 18 | 19116062  | G | A | ESCO1    | missense | 0.519 |
| P2 | 8  | 66637071  | G | T | PDE7A    | missense | 0.517 |
| P2 | 10 | 31138913  | A | G | ZNF438   | missense | 0.514 |
| P2 | 19 | 46328431  | G | C | SYMPK    | missense | 0.512 |
| P2 | 3  | 135742006 | G | T | PPP2R3A  | missense | 0.51  |
| P2 | 12 | 89865472  | T | C | POC1B    | missense | 0.509 |
| P2 | 12 | 53823982  | C | A | AMHR2    | missense | 0.508 |
| P2 | 2  | 133402952 | C | T | GPR39    | missense | 0.5   |
| P2 | 5  | 138661885 | A | C | MATR3    | missense | 0.5   |
| P2 | 7  | 74482491  | G | T | WBSCR16  | missense | 0.5   |
| P2 | 7  | 142829304 | C | T | PIP      | missense | 0.5   |
| P2 | 12 | 58006719  | A | G | ARHGEF25 | missense | 0.5   |
| P2 | 12 | 53045775  | C | T | KRT2     | missense | 0.475 |
| P2 | 12 | 53045776  | C | A | KRT2     | missense | 0.475 |
| P2 | 1  | 146756147 | G | A | CHD1L    | missense | 0.471 |
| P2 | 12 | 54448714  | G | C | HOXC4    | missense | 0.471 |
| P2 | 8  | 80567209  | C | A | STMN2    | missense | 0.458 |
| P2 | 18 | 65178742  | G | T | DSEL     | missense | 0.458 |
| P2 | X  | 32716063  | C | G | DMD      | missense | 0.455 |
| P2 | 17 | 62018228  | A | G | SCN4A    | missense | 0.443 |
| P2 | 12 | 129189938 | G | T | TMEM132C | missense | 0.439 |
| P2 | 2  | 163253342 | A | T | KCNH7    | missense | 0.438 |
| P2 | 12 | 114793615 | A | T | TBX5     | missense | 0.438 |
| P2 | 16 | 3363113   | C | A | ZNF75A   | missense | 0.438 |

|    |    |           |   |   |           |          |       |
|----|----|-----------|---|---|-----------|----------|-------|
| P2 | 17 | 64731685  | G | T | PRKCA     | missense | 0.438 |
| P2 | 10 | 104678647 | G | T | CNNM2     | missense | 0.437 |
| P2 | 16 | 2570886   | T | C | AMDHD2    | missense | 0.436 |
| P2 | 2  | 3751544   | G | T | DCDC2C    | missense | 0.435 |
| P2 | 15 | 89860011  | A | T | POLG      | missense | 0.435 |
| P2 | 2  | 27259411  | G | T | TMEM214   | missense | 0.429 |
| P2 | 7  | 34094890  | G | T | BMPER     | missense | 0.429 |
| P2 | 19 | 12849468  | C | A | ASNA1     | missense | 0.429 |
| P2 | 22 | 30860856  | C | A | SEC14L3   | missense | 0.429 |
| P2 | 17 | 26820689  | T | A | SLC13A2   | missense | 0.42  |
| P2 | 6  | 116977901 | C | A | ZUFSP     | missense | 0.417 |
| P2 | 10 | 84118558  | C | T | NRG3      | missense | 0.417 |
| P2 | 5  | 180664649 | G | T | GNB2L1    | missense | 0.414 |
| P2 | 12 | 132514244 | A | T | EP400     | splicing | 0.414 |
| P2 | 15 | 91422674  | G | T | FURIN     | missense | 0.411 |
| P2 | 15 | 44855347  | C | A | SPG11     | missense | 0.4   |
| P2 | 7  | 31117611  | C | A | ADCYAP1R1 | missense | 0.396 |
| P2 | X  | 105137836 | G | T | NRK       | missense | 0.39  |
| P2 | 12 | 20890103  | G | T | SLCO1C1   | missense | 0.381 |
| P2 | 6  | 168709140 | G | T | DACT2     | missense | 0.368 |
| P2 | 12 | 20890088  | A | G | SLCO1C1   | missense | 0.368 |
| P2 | X  | 49454074  | T | C | PAGE1     | missense | 0.366 |
| P2 | 1  | 244581014 | C | A | ADSS      | missense | 0.364 |
| P2 | 14 | 36244925  | G | C | RALGAPA1  | missense | 0.364 |
| P2 | 15 | 43470898  | A | G | TMEM62    | missense | 0.364 |
| P2 | 14 | 71543029  | C | G | PCNX      | missense | 0.36  |
| P2 | 12 | 69250378  | C | A | CPM       | missense | 0.358 |
| P2 | 14 | 105851249 | C | T | PACS2     | missense | 0.358 |
| P2 | 22 | 32889215  | C | T | FBXO7     | missense | 0.358 |
| P2 | 16 | 68266543  | C | A | ESRP2     | missense | 0.356 |
| P2 | 7  | 151292519 | C | G | PRKAG2    | missense | 0.348 |
| P2 | 3  | 9594208   | G | T | LHFPL4    | missense | 0.345 |
| P2 | 22 | 19964234  | T | C | ARVCF     | missense | 0.345 |
| P2 | 16 | 27374076  | A | T | IL4R      | missense | 0.342 |
| P2 | 18 | 72167116  | G | T | CNDP2     | splicing | 0.341 |
| P2 | 1  | 231506315 | C | A | EGLN1     | missense | 0.333 |
| P2 | 10 | 104159337 | G | C | NFKB2     | missense | 0.333 |
| P2 | 11 | 76871228  | T | A | MYO7A     | missense | 0.333 |



|    |    |             |   |           |          |       |
|----|----|-------------|---|-----------|----------|-------|
| P2 | 20 | 33954411 T  | C | UQCC1     | missense | 0.333 |
| P2 | 19 | 6678434 A   | G | C3        | missense | 0.31  |
| P2 | 3  | 33099698 G  | T | GLB1      | missense | 0.308 |
| P2 | 9  | 38413354 C  | A | IGFBPL1   | splicing | 0.304 |
| P2 | 5  | 151202431 C | T | GLRA1     | missense | 0.3   |
| P2 | 9  | 107367878 C | A | OR13C2    | stopgain | 0.297 |
| P2 | 16 | 2569386 G   | A | ATP6V0C   | missense | 0.288 |
| P2 | 9  | 26906060 C  | A | PLAA      | missense | 0.286 |
| P2 | 10 | 73590984 T  | C | PSAP      | missense | 0.283 |
| P2 | 11 | 22384296 G  | C | SLC17A6   | missense | 0.279 |
| P2 | 17 | 65889510 G  | T | BPTF      | stopgain | 0.278 |
| P2 | 20 | 62843442 G  | T | MYT1      | missense | 0.278 |
| P2 | 7  | 27224247 T  | A | HOXA11    | missense | 0.275 |
| P2 | 1  | 43907956 C  | A | SZT2      | missense | 0.271 |
| P2 | 22 | 40081974 G  | C | CACNA1I   | missense | 0.269 |
| P2 | 12 | 116434846 C | A | MED13L    | missense | 0.265 |
| P2 | 14 | 104145731 A | G | KLC1      | missense | 0.26  |
| P2 | 15 | 45403725 C  | A | DUOX2     | missense | 0.259 |
| P2 | 3  | 38051477 G  | A | PLCD1     | missense | 0.256 |
| P2 | 13 | 28562707 T  | A | URAD      | missense | 0.255 |
| P2 | 2  | 103281557 A | T | SLC9A2    | splicing | 0.254 |
| P2 | 17 | 79988533 A  | G | LRRC45    | missense | 0.254 |
| P2 | 7  | 150034207 G | T | LRRC61    | missense | 0.25  |
| P2 | 9  | 139341455 C | A | SEC16A    | missense | 0.25  |
| P2 | 11 | 58979413 G  | A | MPEG1     | missense | 0.25  |
| P2 | 11 | 60165377 C  | A | MS4A14    | missense | 0.25  |
| P2 | 14 | 81972444 G  | T | SEL1L     | missense | 0.25  |
| P2 | 20 | 44573603 T  | C | PCIF1     | missense | 0.25  |
| P2 | 19 | 2210791 C   | A | DOT1L     | missense | 0.248 |
| P2 | 1  | 35835969 A  | T | ZMYM4     | splicing | 0.246 |
| P2 | 19 | 56126728 G  | A | ZNF865    | missense | 0.241 |
| P2 | 10 | 121086082 T | C | GRK5      | missense | 0.24  |
| P2 | 10 | 53458903 G  | T | CSTF2T    | missense | 0.235 |
| P2 | 11 | 27362351 C  | A | CCDC34    | stopgain | 0.233 |
| P2 | 11 | 1244376 G   | A | MUC5B     | missense | 0.231 |
| P2 | 16 | 52478250 C  | A | TOX3      | stopgain | 0.231 |
| P2 | 19 | 13934316 T  | G | ZSWIM4    | splicing | 0.222 |
| P2 | 7  | 53103845 G  | T | POM121L12 | missense | 0.216 |

|    |    |           |   |   |          |          |       |
|----|----|-----------|---|---|----------|----------|-------|
| P2 | 2  | 71212425  | C | A | ANKRD53  | missense | 0.214 |
| P2 | 1  | 149907560 | C | A | MTMR11   | missense | 0.211 |
| P2 | 19 | 7688146   | C | A | XAB2     | missense | 0.211 |
| P2 | 1  | 204379261 | C | A | PPP1R15B | missense | 0.205 |
| P2 | 1  | 155170761 | T | A | THBS3    | missense | 0.2   |
| P2 | 8  | 18258369  | G | A | NAT2     | missense | 0.2   |
| P2 | 9  | 34385776  | G | T | C9orf24  | missense | 0.2   |
| P2 | 13 | 33315249  | T | C | PDS5B    | missense | 0.2   |
| P2 | 19 | 53075559  | C | T | ZNF701   | missense | 0.195 |
| P2 | 1  | 151262415 | G | T | ZNF687   | missense | 0.194 |
| P2 | 2  | 11752655  | C | A | GREB1    | missense | 0.193 |
| P2 | 19 | 44223273  | C | G | IRGC     | missense | 0.193 |
| P2 | 1  | 201758879 | G | T | NAV1     | missense | 0.192 |
| P2 | 2  | 54080865  | C | A | GPR75    | missense | 0.189 |
| P2 | 16 | 30409926  | A | G | ZNF48    | missense | 0.188 |
| P2 | 2  | 141660599 | C | A | LRP1B    | missense | 0.186 |
| P2 | 2  | 102851383 | G | A | IL1RL2   | missense | 0.185 |
| P2 | 6  | 35108563  | G | T | TCP11    | missense | 0.182 |
| P2 | 7  | 142637639 | C | T | C7orf34  | missense | 0.182 |
| P2 | 7  | 142637640 | C | T | C7orf34  | missense | 0.182 |
| P2 | 11 | 59245740  | C | A | OR4D10   | missense | 0.181 |
| P2 | 10 | 100152821 | C | A | PYROXD2  | missense | 0.179 |
| P2 | 2  | 179455103 | G | A | TTN      | missense | 0.175 |
| P2 | 7  | 100680429 | C | T | MUC17    | missense | 0.174 |
| P2 | 11 | 82644444  | C | A | C11orf82 | missense | 0.174 |
| P2 | 1  | 232626700 | C | A | SIPA1L2  | stopgain | 0.172 |
| P2 | 1  | 249106382 | T | C | SH3BP5L  | missense | 0.172 |
| P2 | 2  | 107429627 | C | G | ST6GAL2  | missense | 0.17  |
| P2 | 17 | 55183515  | C | A | AKAP1    | missense | 0.17  |
| P2 | 14 | 60616907  | T | A | DHRS7    | splicing | 0.169 |
| P2 | 11 | 499825    | T | C | RNH1     | splicing | 0.167 |
| P2 | 12 | 21355466  | G | T | SLCO1B1  | stopgain | 0.167 |
| P2 | 16 | 2221313   | C | A | TRAF7    | missense | 0.167 |
| P2 | 19 | 35981260  | C | A | KRTDAP   | stopgain | 0.167 |
| P2 | 19 | 50099594  | G | T | PRR12    | missense | 0.167 |
| P2 | X  | 102755190 | C | A | RAB40A   | missense | 0.167 |
| P2 | 15 | 78485971  | G | T | ACSBG1   | splicing | 0.164 |
| P2 | 7  | 111617188 | T | C | DOCK4    | missense | 0.16  |

|    |    |             |   |          |          |       |
|----|----|-------------|---|----------|----------|-------|
| P2 | 11 | 117056876 G | A | SIDT2    | missense | 0.157 |
| P2 | 9  | 131709088 G | C | DOLK     | missense | 0.156 |
| P2 | 20 | 46256470 G  | A | NCOA3    | missense | 0.154 |
| P2 | 19 | 50183177 G  | T | PRMT1    | stopgain | 0.152 |
| P2 | 16 | 30100408 C  | A | TBX6     | missense | 0.15  |
| P2 | 16 | 30100409 T  | G | TBX6     | missense | 0.15  |
| P2 | 7  | 134632497 G | T | CALD1    | missense | 0.149 |
| P2 | 10 | 44052472 A  | C | ZNF239   | missense | 0.149 |
| P2 | 9  | 139390801 G | C | NOTCH1   | missense | 0.148 |
| P2 | 19 | 55604197 G  | A | PPP1R12C | missense | 0.148 |
| P2 | 18 | 35065545 C  | A | CELF4    | missense | 0.147 |
| P2 | 3  | 197495444 C | A | FYTTD1   | missense | 0.145 |
| P2 | 1  | 6512097 C   | A | ESPN     | missense | 0.143 |
| P2 | 1  | 26488110 C  | A | FAM110D  | missense | 0.143 |
| P2 | 14 | 73974967 C  | G | HEATR4   | missense | 0.143 |
| P2 | 16 | 1396292 G   | A | BAIAP3   | missense | 0.143 |
| P2 | 4  | 8239281 C   | A | SH3TC1   | missense | 0.138 |
| P2 | 22 | 39123264 G  | A | GTPBP1   | missense | 0.136 |
| P2 | 5  | 140482187 C | A | PCDHB3   | missense | 0.133 |
| P2 | 11 | 92564950 C  | A | FAT3     | missense | 0.133 |
| P2 | 1  | 149895613 C | T | SF3B4    | missense | 0.131 |
| P2 | 22 | 44074012 A  | G | EFCAB6   | missense | 0.131 |
| P2 | 11 | 66360309 T  | C | CCDC87   | missense | 0.13  |
| P2 | X  | 153588015 C | T | FLNA     | splicing | 0.13  |
| P2 | 11 | 125442350 C | A | EI24     | splicing | 0.128 |
| P2 | 16 | 67241884 G  | T | LRRC29   | missense | 0.128 |
| P2 | 17 | 4713216 A   | T | PLD2     | missense | 0.128 |
| P2 | 6  | 31931457 C  | T | SKIV2L   | missense | 0.127 |
| P2 | 1  | 45671927 G  | T | ZSWIM5   | missense | 0.125 |
| P2 | 11 | 66461837 G  | A | SPTBN2   | splicing | 0.125 |
| P2 | 18 | 65180215 G  | C | DSEL     | missense | 0.125 |
| P2 | 19 | 32954343 A  | G | DPY19L3  | missense | 0.125 |
| P2 | 20 | 3732649 G   | A | HSPA12B  | missense | 0.125 |
| P2 | 11 | 1471817 G   | T | BRSK2    | missense | 0.124 |
| P2 | 2  | 238419431 C | A | MLPH     | missense | 0.123 |
| P2 | 7  | 100490908 C | A | ACHE     | stopgain | 0.123 |
| P2 | 14 | 64699971 C  | A | ESR2     | stopgain | 0.123 |
| P2 | 3  | 42705951 C  | A | ZBTB47   | missense | 0.122 |

|    |    |           |   |   |         |          |       |
|----|----|-----------|---|---|---------|----------|-------|
| P2 | X  | 114468292 | C | T | LRCH2   | missense | 0.122 |
| P2 | 9  | 99180101  | G | A | ZNF367  | missense | 0.121 |
| P2 | 1  | 33985489  | G | T | CSMD2   | missense | 0.119 |
| P2 | 5  | 133896493 | T | C | JADE2   | missense | 0.119 |
| P2 | 12 | 113909202 | C | A | LHX5    | missense | 0.119 |
| P2 | 11 | 35198196  | G | T | CD44    | stopgain | 0.118 |
| P2 | X  | 47104189  | G | T | USP11   | missense | 0.118 |
| P2 | 8  | 61732627  | G | A | CHD7    | missense | 0.117 |
| P2 | 1  | 231830127 | C | A | DISC1   | stopgain | 0.113 |
| P2 | 19 | 11310991  | C | A | DOCK6   | missense | 0.113 |
| P2 | 3  | 182897280 | C | A | MCF2L2  | missense | 0.109 |
| P2 | 12 | 94641769  | A | T | PLXNC1  | stopgain | 0.108 |
| P2 | 13 | 103386918 | C | A | CCDC168 | missense | 0.108 |
| P2 | 14 | 64491855  | T | C | SYNE2   | missense | 0.108 |
| P2 | 19 | 11339668  | C | A | DOCK6   | missense | 0.107 |
| P2 | 2  | 179399791 | T | C | TTN     | missense | 0.106 |
| P2 | 15 | 69327843  | C | A | NOX5    | missense | 0.106 |
| P2 | 17 | 61574348  | T | C | ACE     | splicing | 0.106 |
| P2 | 10 | 100017750 | G | A | LOXL4   | missense | 0.105 |
| P2 | 11 | 134131047 | G | A | ACAD8   | missense | 0.105 |
| P2 | 15 | 90347829  | G | C | ANPEP   | missense | 0.105 |
| P2 | 16 | 1395890   | A | G | BAIAP3  | missense | 0.105 |
| P2 | 1  | 249142626 | C | A | ZNF672  | missense | 0.104 |
| P2 | 11 | 123810490 | A | C | OR4D5   | missense | 0.104 |
| P2 | 17 | 53844720  | G | T | PCTP    | missense | 0.104 |
| P2 | 2  | 220312919 | G | A | SPEG    | missense | 0.103 |
| P2 | 8  | 109226947 | T | A | EIF3E   | splicing | 0.103 |
| P2 | 11 | 126147430 | G | A | FOXRED1 | missense | 0.103 |
| P2 | 20 | 60640825  | G | T | TAF4    | missense | 0.103 |
| P2 | 17 | 15848605  | C | A | ADORA2B | missense | 0.101 |
| P2 | 3  | 48698335  | C | A | CELSR3  | missense | 0.1   |
| P2 | 6  | 159204585 | G | A | EZR     | missense | 0.1   |
| P2 | 19 | 4229605   | G | A | EBI3    | missense | 0.1   |
| P2 | 19 | 58355669  | A | G | ZNF587B | missense | 0.099 |
| P2 | 9  | 139925552 | G | C | FUT7    | missense | 0.098 |
| P2 | 12 | 50744605  | G | A | FAM186A | stopgain | 0.098 |
| P2 | 19 | 42752760  | C | T | ERF     | missense | 0.098 |
| P2 | 20 | 44539831  | G | T | PLTP    | missense | 0.097 |

|    |    |             |   |           |          |       |
|----|----|-------------|---|-----------|----------|-------|
| P2 | 12 | 2933013 T   | C | ITFG2     | missense | 0.096 |
| P2 | 19 | 1487277 T   | C | PCSK4     | missense | 0.096 |
| P2 | 2  | 238672229 G | A | LRRFIP1   | missense | 0.095 |
| P2 | 15 | 41804121 C  | A | LTK       | missense | 0.095 |
| P2 | 19 | 51483042 A  | T | KLK7      | splicing | 0.095 |
| P2 | 22 | 39178691 G  | T | DNAL4     | missense | 0.095 |
| P2 | 3  | 169513295 T | C | LRRC34    | missense | 0.093 |
| P2 | 16 | 87417045 G  | T | FBXO31    | missense | 0.093 |
| P2 | 17 | 72365627 T  | A | GPR142    | missense | 0.093 |
| P2 | 18 | 32843982 C  | T | ZSCAN30   | missense | 0.093 |
| P2 | 19 | 52131224 G  | T | SIGLEC5   | missense | 0.093 |
| P2 | 3  | 122869103 G | A | PDIA5     | missense | 0.092 |
| P2 | 6  | 168430272 T | A | KIF25     | missense | 0.092 |
| P2 | 7  | 86542273 C  | T | KIAA1324L | missense | 0.091 |
| P2 | 16 | 30747707 G  | A | SRCAP     | missense | 0.091 |
| P2 | 2  | 179448567 G | T | TTN       | missense | 0.089 |
| P2 | 19 | 4028959 C   | A | PIAS4     | missense | 0.089 |
| P2 | 20 | 61919205 T  | A | ARFGAP1   | missense | 0.089 |
| P2 | X  | 70444377 G  | A | GJB1      | missense | 0.089 |
| P2 | 6  | 34003531 G  | C | GRM4      | missense | 0.086 |
| P2 | 3  | 9781349 G   | T | BRPF1     | missense | 0.085 |
| P2 | 5  | 141694072 C | T | SPRY4     | missense | 0.085 |
| P2 | 18 | 52556498 G  | T | RAB27B    | stopgain | 0.085 |
| P2 | 19 | 36435510 C  | A | LRFN3     | stopgain | 0.085 |
| P2 | 19 | 36224082 T  | A | KMT2B     | missense | 0.084 |
| P2 | 5  | 121187815 G | T | FTMT      | missense | 0.083 |
| P2 | 7  | 150656798 C | A | KCNH2     | missense | 0.083 |
| P2 | 22 | 20759990 G  | T | ZNF74     | missense | 0.083 |
| P2 | 2  | 25966871 C  | T | ASXL2     | missense | 0.082 |
| P2 | 3  | 126915571 C | T | C3orf56   | missense | 0.082 |
| P2 | 10 | 96022445 C  | T | PLCE1     | stopgain | 0.082 |
| P2 | 11 | 64938826 G  | T | SPDYC     | stopgain | 0.082 |
| P2 | 12 | 5155141 G   | T | KCNA5     | stopgain | 0.082 |
| P2 | 15 | 93595342 C  | G | RGMA      | missense | 0.082 |
| P2 | 17 | 37933933 C  | T | IKZF3     | missense | 0.082 |
| P2 | 17 | 80050596 C  | T | FASN      | missense | 0.082 |
| P2 | 13 | 39598692 C  | A | PROSER1   | missense | 0.081 |
| P2 | 16 | 601565 C    | A | CAPN15    | missense | 0.081 |

|    |    |           |   |   |                      |          |       |
|----|----|-----------|---|---|----------------------|----------|-------|
| P2 | 17 | 7918085   | G | T | GUCY2D               | splicing | 0.081 |
| P2 | 20 | 62193452  | G | T | HELZ2                | missense | 0.081 |
| P2 | X  | 153129897 | C | T | L1CAM                | missense | 0.081 |
| P3 | 5  | 127597503 | G | T | FBN2                 | stopgain | 0.87  |
| P3 | Y  | 24052528  | A | T | RBMY1E,RBMY1D,RBMY1B | missense | 0.733 |
| P3 | 5  | 88056876  | G | T | MEF2C                | missense | 0.717 |
| P3 | 5  | 88056875  | G | T | MEF2C                | missense | 0.705 |
| P3 | 12 | 121678545 | C | A | CAMKK2               | missense | 0.696 |
| P3 | 4  | 80328658  | C | A | GK2                  | missense | 0.689 |
| P3 | 5  | 94882848  | T | C | TTC37                | missense | 0.658 |
| P3 | 6  | 160961177 | G | T | LPA                  | missense | 0.596 |
| P3 | 10 | 26414381  | A | G | MYO3A                | missense | 0.558 |
| P3 | X  | 64709063  | G | A | ZC3H12B              | missense | 0.535 |
| P3 | 6  | 33372999  | G | T | KIFC1                | missense | 0.525 |
| P3 | 11 | 5730609   | A | T | TRIM22               | missense | 0.516 |
| P3 | 6  | 167754427 | C | G | TTL2                 | missense | 0.483 |
| P3 | 6  | 139498126 | A | T | HECA                 | missense | 0.482 |
| P3 | 15 | 90631824  | C | T | IDH2                 | missense | 0.48  |
| P3 | 13 | 51915327  | G | T | SERPINE3             | missense | 0.477 |
| P3 | 3  | 142089368 | C | A | XRN1                 | missense | 0.463 |
| P3 | 10 | 28276471  | C | T | ARMC4                | missense | 0.463 |
| P3 | 4  | 111542372 | G | T | PITX2                | missense | 0.462 |
| P3 | 2  | 71576133  | C | A | ZNF638               | missense | 0.458 |
| P3 | 11 | 57885980  | T | G | OR9I1                | missense | 0.451 |
| P3 | 12 | 108603971 | A | T | WSCD2                | missense | 0.447 |
| P3 | 5  | 176024386 | C | T | GPRIN1               | missense | 0.438 |
| P3 | 19 | 52825164  | C | T | ZNF480               | missense | 0.423 |
| P3 | 1  | 31896615  | C | T | SERINC2              | missense | 0.412 |
| P3 | 14 | 20296309  | C | G | OR4N2                | missense | 0.41  |
| P3 | 19 | 51563863  | C | G | KLK13                | missense | 0.393 |
| P3 | 4  | 121957720 | C | G | NDNF                 | missense | 0.39  |
| P3 | 8  | 106814943 | C | T | ZFPM2                | missense | 0.389 |
| P3 | 7  | 37780296  | C | A | GPR141               | missense | 0.383 |
| P3 | 1  | 76199310  | G | T | ACADM                | missense | 0.378 |
| P3 | 7  | 34118759  | G | T | BMPER                | missense | 0.373 |
| P3 | 2  | 152476108 | C | A | NEB                  | missense | 0.368 |
| P3 | 19 | 15079287  | G | A | SLC1A6               | missense | 0.365 |
| P3 | 19 | 17392697  | G | T | ANKLE1               | missense | 0.355 |

|    |    |           |   |   |          |          |       |
|----|----|-----------|---|---|----------|----------|-------|
| P3 | 19 | 52327045  | T | A | FPR3     | missense | 0.342 |
| P3 | 5  | 39341715  | T | A | C9       | missense | 0.327 |
| P3 | 3  | 20027112  | T | G | PP2D1    | missense | 0.325 |
| P3 | 7  | 87165770  | G | A | ABCB1    | splicing | 0.316 |
| P3 | 8  | 141551324 | C | A | AGO2     | missense | 0.315 |
| P3 | 11 | 118627894 | C | A | DDX6     | missense | 0.313 |
| P3 | X  | 135572378 | T | C | BRS3     | missense | 0.302 |
| P3 | 8  | 110980765 | A | G | KCNV1    | missense | 0.291 |
| P3 | 19 | 57642159  | G | T | USP29    | missense | 0.289 |
| P3 | 18 | 29867305  | C | A | GAREM    | missense | 0.286 |
| P3 | 9  | 122011336 | C | A | BRINP1   | missense | 0.282 |
| P3 | 10 | 67680176  | G | T | CTNNA3   | missense | 0.281 |
| P3 | 13 | 39447012  | A | T | FREM2    | missense | 0.279 |
| P3 | 22 | 40058003  | G | T | CACNA1I  | missense | 0.273 |
| P3 | 7  | 127954945 | C | A | RBM28    | missense | 0.272 |
| P3 | 15 | 28947136  | G | T | GOLGA8M  | missense | 0.271 |
| P3 | 6  | 24654675  | T | A | TDP2     | missense | 0.258 |
| P3 | 11 | 11987471  | C | T | DKK3     | missense | 0.255 |
| P3 | 6  | 3259430   | C | A | PSMG4    | stopgain | 0.254 |
| P3 | 17 | 72368660  | C | T | GPR142   | missense | 0.25  |
| P3 | 6  | 70993506  | C | A | COL9A1   | missense | 0.24  |
| P3 | 12 | 130890749 | A | C | RIMBP2   | missense | 0.239 |
| P3 | 2  | 18741477  | G | C | RDH14    | missense | 0.238 |
| P3 | 4  | 128584729 | C | T | INTU     | missense | 0.229 |
| P3 | 6  | 117638326 | G | A | ROS1     | missense | 0.227 |
| P3 | 19 | 57328771  | C | A | PEG3     | missense | 0.223 |
| P3 | 11 | 101833585 | G | A | KIAA1377 | missense | 0.221 |
| P3 | 11 | 58189977  | A | G | OR5B2    | missense | 0.218 |
| P3 | 2  | 5833428   | G | T | SOX11    | missense | 0.216 |
| P3 | 7  | 7678778   | A | G | RPA3     | splicing | 0.208 |
| P3 | 14 | 20917415  | T | G | OSGEP    | missense | 0.204 |
| P3 | 11 | 55322174  | C | A | OR4C15   | missense | 0.202 |
| P3 | 9  | 34405926  | C | G | FAM219A  | missense | 0.2   |
| P3 | 20 | 62597501  | T | C | ZNF512B  | missense | 0.19  |
| P3 | 2  | 141459762 | C | A | LRP1B    | missense | 0.188 |
| P3 | 2  | 201726497 | C | A | CLK1     | missense | 0.188 |
| P3 | 11 | 128680503 | A | G | FLI1     | missense | 0.186 |
| P3 | 11 | 68773249  | G | T | MRGPRF   | missense | 0.184 |

|    |    |           |   |   |        |          |       |
|----|----|-----------|---|---|--------|----------|-------|
| P3 | 22 | 26423609  | G | T | MYO18B | missense | 0.184 |
| P3 | 8  | 42045071  | G | T | PLAT   | stopgain | 0.182 |
| P3 | 2  | 96688961  | G | A | GPAT2  | missense | 0.18  |
| P3 | 6  | 138753261 | T | C | NHSL1  | missense | 0.171 |
| P3 | 16 | 72827761  | G | C | ZFHX3  | missense | 0.171 |
| P3 | 1  | 16272798  | G | T | ZBTB17 | missense | 0.167 |
| P3 | 19 | 41089316  | C | A | SHKBP1 | missense | 0.167 |
| P3 | 19 | 54967985  | G | A | LENG8  | missense | 0.167 |
| P3 | X  | 139866483 | C | A | CDR1   | stopgain | 0.163 |
| P3 | 9  | 103108419 | G | T | TEX10  | missense | 0.16  |
| P3 | 16 | 89753141  | G | T | CDK10  | missense | 0.16  |
| P3 | 1  | 220253185 | C | A | BPNT1  | missense | 0.158 |
| P3 | 3  | 169485672 | C | T | ACTRT3 | missense | 0.158 |
| P3 | 9  | 99700764  | C | T | NUTM2G | missense | 0.158 |
| P3 | 5  | 58295336  | C | A | PDE4D  | missense | 0.154 |
| P3 | 16 | 67267649  | G | T | FHOD1  | missense | 0.154 |
| P3 | 10 | 113924315 | C | A | GPAM   | missense | 0.153 |
| P3 | 8  | 6479077   | G | T | MCPH1  | missense | 0.152 |
| P3 | 10 | 99126293  | C | A | RRP12  | missense | 0.149 |
| P3 | 19 | 3977282   | C | A | EEF2   | stopgain | 0.148 |
| P3 | 1  | 220253186 | C | T | BPNT1  | missense | 0.145 |
| P3 | 2  | 11351969  | A | G | ROCK2  | splicing | 0.143 |
| P3 | 8  | 144407589 | G | A | TOP1MT | missense | 0.143 |
| P3 | 19 | 43258484  | C | A | PSG8   | missense | 0.143 |
| P3 | 2  | 109237845 | C | T | LIMS1  | missense | 0.14  |
| P3 | 4  | 187130268 | G | T | CYP4V2 | missense | 0.14  |
| P3 | 3  | 180372712 | T | A | CCDC39 | missense | 0.139 |
| P3 | 9  | 136226921 | C | A | SURF2  | missense | 0.139 |
| P3 | 2  | 128387379 | C | A | MYO7B  | missense | 0.138 |
| P3 | 5  | 140056318 | G | T | HARS   | missense | 0.136 |
| P3 | 1  | 153635707 | G | T | ILF2   | missense | 0.135 |
| P3 | 2  | 234704940 | G | T | MROH2A | missense | 0.135 |
| P3 | 7  | 142460726 | C | A | PRSS1  | missense | 0.134 |
| P3 | 11 | 117869473 | C | A | IL10RA | missense | 0.133 |
| P3 | 3  | 38766760  | G | T | SCN10A | missense | 0.132 |
| P3 | 21 | 40181990  | A | T | ETS2   | missense | 0.132 |
| P3 | 19 | 18561368  | C | T | ELL    | missense | 0.131 |
| P3 | 7  | 150217224 | G | T | GIMAP7 | missense | 0.13  |



|    |    |           |   |   |              |          |       |
|----|----|-----------|---|---|--------------|----------|-------|
| P3 | 15 | 81282116  | C | A | MESDC2       | missense | 0.13  |
| P3 | 11 | 27363082  | C | A | CCDC34       | stopgain | 0.129 |
| P3 | 5  | 176778602 | C | G | LMAN2        | missense | 0.128 |
| P3 | 6  | 153078237 | G | T | VIP          | missense | 0.127 |
| P3 | 12 | 54765467  | C | A | ZNF385A      | stopgain | 0.127 |
| P3 | 15 | 58001109  | C | T | POLR2M,GCOM1 | missense | 0.127 |
| P3 | 15 | 42105867  | G | T | MAPKBP1      | missense | 0.125 |
| P3 | 8  | 41790178  | G | T | KAT6A        | missense | 0.124 |
| P3 | 2  | 97353569  | G | T | FER1L5       | missense | 0.122 |
| P3 | 2  | 220354087 | C | A | SPEG         | missense | 0.122 |
| P3 | 3  | 14206988  | C | T | XPC          | missense | 0.122 |
| P3 | 8  | 27303365  | C | A | PTK2B        | missense | 0.122 |
| P3 | 15 | 43028236  | C | T | CDAN1        | missense | 0.122 |
| P3 | 22 | 21065041  | G | A | PI4KA        | missense | 0.122 |
| P3 | 1  | 247267248 | G | T | ZNF669       | missense | 0.121 |
| P3 | 12 | 6729594   | C | A | LPAR5        | missense | 0.121 |
| P3 | 12 | 122217483 | C | T | RHOF         | missense | 0.121 |
| P3 | 16 | 77228267  | C | A | MON1B        | missense | 0.121 |
| P3 | 2  | 179552837 | C | A | TTN          | splicing | 0.12  |
| P3 | 12 | 129360562 | G | T | GLT1D1       | missense | 0.12  |
| P3 | 10 | 115451825 | C | A | CASP7        | missense | 0.119 |
| P3 | 1  | 11579504  | G | C | PTCHD2       | missense | 0.118 |
| P3 | 13 | 50589831  | C | A | KCNRG        | missense | 0.118 |
| P3 | 10 | 103916984 | G | T | NOLC1        | missense | 0.116 |
| P3 | 19 | 49518397  | G | A | RUVBL2       | missense | 0.116 |
| P3 | 19 | 55880249  | C | A | IL11         | missense | 0.116 |
| P3 | 4  | 110687962 | C | A | CFI          | stopgain | 0.114 |
| P3 | 15 | 83502065  | A | C | WHAMM        | missense | 0.114 |
| P3 | 10 | 29747448  | G | T | SVIL         | missense | 0.113 |
| P3 | 11 | 294643    | G | T | ATHL1        | missense | 0.113 |
| P3 | 11 | 64896071  | C | A | SYVN1        | missense | 0.113 |
| P3 | 15 | 83502066  | C | G | WHAMM        | missense | 0.113 |
| P3 | 7  | 47852816  | G | T | PKD1L1       | missense | 0.112 |
| P3 | 12 | 113633582 | C | A | IQCD         | missense | 0.111 |
| P3 | X  | 56310880  | C | T | KLF8         | missense | 0.111 |
| P3 | 10 | 79595508  | C | T | DLG5         | missense | 0.109 |
| P3 | 16 | 28497925  | G | T | CLN3         | missense | 0.109 |
| P3 | 19 | 17728573  | G | T | UNC13A       | stopgain | 0.109 |

|    |    |           |   |   |                            |          |       |
|----|----|-----------|---|---|----------------------------|----------|-------|
| P3 | 8  | 146003495 | G | A | ZNF34                      | missense | 0.108 |
| P3 | 1  | 178427187 | G | T | RASAL2                     | missense | 0.107 |
| P3 | 3  | 154002739 | C | A | DHX36                      | missense | 0.107 |
| P3 | 15 | 22369053  | G | T | LOC727924,LOC101927079,OR4 | missense | 0.107 |
| P3 | 6  | 31133854  | G | T | POU5F1                     | missense | 0.105 |
| P3 | 15 | 42164560  | C | T | SPTBN5                     | missense | 0.105 |
| P3 | 3  | 51475791  | C | A | VPRBP                      | missense | 0.104 |
| P3 | 4  | 129782960 | C | A | JADE1                      | missense | 0.104 |
| P3 | 6  | 116574663 | C | A | TSPYL4                     | missense | 0.104 |
| P3 | 7  | 103179707 | C | A | RELN                       | missense | 0.103 |
| P3 | 14 | 59945965  | A | G | L3HYPDH                    | missense | 0.103 |
| P3 | 19 | 40901021  | G | A | PRX                        | missense | 0.103 |
| P3 | X  | 118968953 | C | T | UPF3B                      | missense | 0.103 |
| P3 | 1  | 172357799 | C | A | DNM3                       | missense | 0.102 |
| P3 | 10 | 121411220 | G | T | BAG3                       | missense | 0.102 |
| P3 | 11 | 5776197   | G | T | OR52N4                     | missense | 0.102 |
| P3 | X  | 133627547 | G | T | HPRT1                      | missense | 0.102 |
| P3 | 14 | 24627405  | G | T | RNF31                      | stopgain | 0.101 |
| P3 | 7  | 100240941 | G | T | ACTL6B                     | missense | 0.1   |
| P3 | 15 | 100211595 | C | A | MEF2A                      | missense | 0.098 |
| P3 | 16 | 58076243  | C | T | MMP15                      | missense | 0.098 |
| P3 | 19 | 10077060  | G | T | COL5A3                     | stopgain | 0.098 |
| P3 | 17 | 76182899  | C | A | TK1                        | missense | 0.097 |
| P3 | 1  | 161144877 | C | A | B4GALT3                    | missense | 0.096 |
| P3 | 3  | 111604075 | C | G | PHLDB2                     | missense | 0.096 |
| P3 | 4  | 1389468   | C | A | CRIPAK                     | missense | 0.096 |
| P3 | 10 | 1170262   | C | A | WDR37                      | missense | 0.096 |
| P3 | 1  | 186646783 | C | A | PTGS2                      | missense | 0.095 |
| P3 | 5  | 63665546  | G | T | RNF180                     | missense | 0.095 |
| P3 | 5  | 63802619  | G | T | RGS7BP                     | splicing | 0.095 |
| P3 | 8  | 101717220 | C | T | PABPC1                     | missense | 0.095 |
| P3 | 10 | 90429618  | C | A | LIPF                       | missense | 0.094 |
| P3 | 11 | 63681782  | C | T | RCOR2                      | missense | 0.094 |
| P3 | 1  | 6007196   | C | A | NPHP4                      | missense | 0.093 |
| P3 | 2  | 207564450 | C | T | DYTN                       | splicing | 0.093 |
| P3 | 7  | 149462672 | G | A | ZNF467                     | missense | 0.093 |
| P3 | 9  | 90537344  | C | A | SPATA31C1                  | missense | 0.093 |
| P3 | 17 | 80059685  | G | T | CCDC57                     | missense | 0.093 |

|    |    |           |   |   |         |          |       |
|----|----|-----------|---|---|---------|----------|-------|
| P3 | 19 | 11537743  | G | T | CCDC151 | missense | 0.093 |
| P3 | 6  | 33170701  | G | T | SLC39A7 | missense | 0.092 |
| P3 | 11 | 65733827  | C | G | SART1   | missense | 0.092 |
| P3 | 17 | 66928656  | C | A | ABCA8   | splicing | 0.092 |
| P3 | 5  | 66462008  | C | A | MAST4   | missense | 0.091 |
| P3 | 9  | 116832011 | C | G | AMBP    | missense | 0.091 |
| P3 | 10 | 45799821  | C | A | OR13A1  | missense | 0.091 |
| P3 | 12 | 48375575  | C | A | COL2A1  | missense | 0.091 |
| P3 | 1  | 228463697 | G | C | OBSCN   | missense | 0.09  |
| P3 | 3  | 28373410  | G | A | AZI2    | missense | 0.09  |
| P3 | 9  | 102992093 | C | A | INVS    | missense | 0.09  |
| P3 | 16 | 1248662   | G | T | CACNA1H | missense | 0.09  |
| P3 | 17 | 41341684  | C | A | NBR1    | missense | 0.089 |
| P3 | 19 | 7584223   | A | G | ZNF358  | missense | 0.089 |
| P3 | 5  | 11098778  | G | T | CTNND2  | missense | 0.088 |
| P3 | 15 | 42984511  | G | T | STARD9  | missense | 0.088 |
| P3 | 19 | 42736247  | G | T | GSK3A   | missense | 0.088 |
| P3 | 19 | 15905287  | C | A | OR10H5  | stopgain | 0.087 |
| P3 | 22 | 21800942  | G | T | HIC2    | missense | 0.087 |
| P3 | 4  | 52777344  | C | T | DCUN1D4 | splicing | 0.086 |
| P3 | X  | 147919202 | C | G | AFF2    | missense | 0.086 |
| P3 | 1  | 10713692  | G | A | CASZ1   | missense | 0.085 |
| P3 | 1  | 46751477  | G | T | LRRC41  | missense | 0.085 |
| P3 | 2  | 206614492 | C | A | NRP2    | missense | 0.085 |
| P3 | 10 | 121689221 | G | T | SEC23IP | missense | 0.085 |
| P3 | 6  | 43152384  | G | T | CUL9    | missense | 0.084 |
| P3 | 9  | 35403218  | C | A | UNC13B  | missense | 0.084 |
| P3 | Y  | 16831365  | G | T | NLGN4Y  | missense | 0.084 |
| P3 | 6  | 32267714  | C | A | C6orf10 | splicing | 0.083 |
| P3 | 11 | 247295    | G | T | PSMD13  | stopgain | 0.083 |
| P3 | 11 | 14989369  | C | A | CALCA   | missense | 0.083 |
| P3 | 18 | 47810350  | G | A | CXXC1   | missense | 0.083 |
| P3 | 2  | 238680767 | G | T | LRRFIP1 | missense | 0.082 |
| P3 | 6  | 119136775 | G | T | MCM9    | missense | 0.082 |
| P3 | 11 | 4661722   | C | G | OR51D1  | missense | 0.082 |
| P3 | 15 | 64067257  | C | A | HERC1   | missense | 0.082 |
| P3 | 17 | 76212078  | A | C | BIRC5   | missense | 0.082 |
| P3 | 19 | 10782069  | G | A | ILF3    | missense | 0.082 |

|    |    |           |   |   |          |          |       |
|----|----|-----------|---|---|----------|----------|-------|
| P3 | 19 | 11606875  | A | G | ZNF653   | missense | 0.082 |
| P3 | 2  | 189872819 | C | A | COL3A1   | missense | 0.081 |
| P3 | 3  | 44945399  | C | A | TGM4     | missense | 0.081 |
| P3 | 7  | 44802938  | G | A | ZMIZ2    | missense | 0.081 |
| P3 | 10 | 76993986  | G | T | COMTD1   | splicing | 0.081 |
| P3 | 11 | 65786358  | G | A | CATSPER1 | missense | 0.081 |
| P3 | 17 | 76490241  | G | T | DNAH17   | missense | 0.081 |
| P4 | X  | 125685627 | G | A | DCAF12L1 | missense | 0.375 |
| P4 | X  | 78011477  | T | C | LPAR4    | stoploss | 0.333 |
| P4 | X  | 114424992 | G | T | RBMXL3   | stopgain | 0.333 |
| P4 | X  | 47918722  | G | C | ZNF630   | missense | 0.324 |
| P4 | X  | 135428803 | A | T | GPR112   | missense | 0.294 |
| P4 | X  | 17818566  | C | G | RAI2     | missense | 0.272 |
| P4 | X  | 154011768 | C | G | MPP1     | missense | 0.264 |
| P4 | 1  | 157557090 | G | T | FCRL4    | missense | 0.263 |
| P4 | 19 | 17370755  | C | A | USHBP1   | missense | 0.263 |
| P4 | 1  | 220863970 | G | C | C1orf115 | missense | 0.256 |
| P4 | X  | 82763615  | C | T | POU3F4   | missense | 0.254 |
| P4 | 2  | 128477016 | C | A | WDR33    | missense | 0.246 |
| P4 | 9  | 21974780  | A | T | CDKN2A   | missense | 0.239 |
| P4 | 2  | 152397291 | T | A | NEB      | stopgain | 0.238 |
| P4 | 14 | 63246577  | C | A | KCNH5    | missense | 0.228 |
| P4 | 2  | 32614012  | G | A | BIRC6    | splicing | 0.227 |
| P4 | 14 | 62547877  | C | T | SYT16    | missense | 0.222 |
| P4 | X  | 132161318 | G | C | USP26    | missense | 0.222 |
| P4 | 6  | 32065139  | C | A | TNXB     | missense | 0.221 |
| P4 | X  | 140984712 | A | T | MAGEC3   | missense | 0.216 |
| P4 | 15 | 72190370  | T | C | MYO9A    | missense | 0.215 |
| P4 | 2  | 179590628 | G | T | TTN      | stopgain | 0.214 |
| P4 | 17 | 42337808  | C | A | SLC4A1   | missense | 0.213 |
| P4 | 1  | 62739453  | C | A | KANK4    | missense | 0.212 |
| P4 | 17 | 72350664  | G | A | KIF19    | missense | 0.212 |
| P4 | 10 | 104590724 | G | T | CYP17A1  | missense | 0.211 |
| P4 | 2  | 21226031  | T | A | APOB     | missense | 0.21  |
| P4 | 2  | 176829257 | C | A | KIAA1715 | missense | 0.21  |
| P4 | 2  | 192711573 | T | A | SDPR     | missense | 0.21  |
| P4 | 19 | 2078400   | C | A | MOB3A    | missense | 0.209 |
| P4 | 2  | 3595576   | T | C | RNASEH1  | missense | 0.208 |

|    |    |             |   |          |          |       |
|----|----|-------------|---|----------|----------|-------|
| P4 | 19 | 54409668 G  | T | PRKCG    | missense | 0.204 |
| P4 | 5  | 170239221 C | A | GABRP    | missense | 0.203 |
| P4 | 2  | 242814055 G | C | CXXC11   | missense | 0.2   |
| P4 | 12 | 118517258 C | A | VSIG10   | missense | 0.2   |
| P4 | 18 | 8718552 A   | T | SOGA2    | missense | 0.2   |
| P4 | 19 | 10406265 G  | A | ICAM5    | missense | 0.2   |
| P4 | 7  | 156469117 T | C | RNF32    | missense | 0.198 |
| P4 | 2  | 179455430 T | A | TTN      | missense | 0.197 |
| P4 | 8  | 145577640 T | A | TMEM249  | missense | 0.196 |
| P4 | 4  | 111398196 C | A | ENPEP    | missense | 0.194 |
| P4 | X  | 48674335 G  | A | HDAC6    | missense | 0.194 |
| P4 | 2  | 54131223 A  | G | PSME4    | missense | 0.193 |
| P4 | 2  | 179436865 G | T | TTN      | missense | 0.191 |
| P4 | 14 | 104219518 C | G | PPP1R13B | missense | 0.191 |
| P4 | 13 | 103249407 G | A | TPP2     | missense | 0.19  |
| P4 | 12 | 57618776 G  | T | NXPH4    | missense | 0.189 |
| P4 | 17 | 48243424 C  | T | SGCA     | missense | 0.188 |
| P4 | 2  | 179412135 A | T | TTN      | missense | 0.186 |
| P4 | 3  | 43097745 C  | T | FAM198A  | missense | 0.185 |
| P4 | X  | 134992248 G | A | SAGE1    | missense | 0.185 |
| P4 | 21 | 34634883 G  | T | IFNAR2   | missense | 0.182 |
| P4 | 12 | 131605388 G | T | GPR133   | splicing | 0.181 |
| P4 | 17 | 40330149 C  | A | KCNH4    | missense | 0.181 |
| P4 | 2  | 1320089 G   | T | SNTG2    | missense | 0.179 |
| P4 | 5  | 55252064 C  | A | IL6ST    | splicing | 0.179 |
| P4 | 16 | 904542 C    | A | LMF1     | missense | 0.179 |
| P4 | 1  | 179526186 C | A | NPHS2    | missense | 0.178 |
| P4 | 20 | 7875866 C   | T | HAO1     | missense | 0.176 |
| P4 | 19 | 56599685 C  | A | ZNF787   | missense | 0.175 |
| P4 | 5  | 141693992 G | C | SPRY4    | missense | 0.173 |
| P4 | 21 | 43411500 G  | T | ZBTB21   | missense | 0.173 |
| P4 | 3  | 49698764 G  | T | BSN      | missense | 0.171 |
| P4 | 3  | 195505829 G | A | MUC4     | missense | 0.171 |
| P4 | 6  | 132643976 C | A | MOXD1    | missense | 0.171 |
| P4 | 9  | 130829073 C | T | NAIF1    | missense | 0.17  |
| P4 | 2  | 74867335 C  | G | M1AP     | missense | 0.169 |
| P4 | 2  | 164466229 G | A | FIGN     | missense | 0.169 |
| P4 | 2  | 170863624 A | T | UBR3     | missense | 0.169 |

|    |    |           |   |   |              |          |       |
|----|----|-----------|---|---|--------------|----------|-------|
| P4 | 5  | 55809696  | G | T | LOC101928448 | missense | 0.169 |
| P4 | 12 | 54349188  | G | T | HOXC12       | missense | 0.169 |
| P4 | 9  | 101797366 | T | A | COL15A1      | missense | 0.168 |
| P4 | 12 | 26749887  | T | C | ITPR2        | missense | 0.168 |
| P4 | 12 | 8906593   | G | T | RIMKLB       | stopgain | 0.167 |
| P4 | 19 | 45815072  | C | G | CKM          | missense | 0.167 |
| P4 | 1  | 186327683 | A | G | TPR          | missense | 0.166 |
| P4 | 19 | 44377895  | T | C | ZNF404       | missense | 0.165 |
| P4 | 1  | 26369041  | T | C | SLC30A2      | missense | 0.164 |
| P4 | 7  | 142836275 | C | A | PIP          | stopgain | 0.164 |
| P4 | 8  | 124138386 | A | T | TBC1D31      | missense | 0.164 |
| P4 | 4  | 73149047  | C | A | ADAMTS3      | missense | 0.163 |
| P4 | 5  | 24511625  | T | A | CDH10        | splicing | 0.163 |
| P4 | 7  | 103038403 | T | A | SLC26A5      | missense | 0.162 |
| P4 | 9  | 139358924 | G | A | SEC16A       | missense | 0.162 |
| P4 | 17 | 10359873  | C | T | MYH4         | splicing | 0.161 |
| P4 | 3  | 124748215 | T | A | HEG1         | missense | 0.16  |
| P4 | 6  | 66042287  | G | C | EYS          | missense | 0.16  |
| P4 | 14 | 20848590  | C | A | TEP1         | missense | 0.16  |
| P4 | 2  | 210791636 | C | A | UNC80        | missense | 0.159 |
| P4 | 8  | 95504959  | G | A | KIAA1429     | missense | 0.159 |
| P4 | 19 | 39899117  | C | G | ZFP36        | missense | 0.159 |
| P4 | 5  | 40976935  | G | A | C7           | missense | 0.157 |
| P4 | 10 | 63170359  | C | A | TMEM26       | missense | 0.157 |
| P4 | 17 | 40817543  | A | G | TUBG2        | missense | 0.157 |
| P4 | 3  | 28454562  | G | T | ZCWPW2       | missense | 0.156 |
| P4 | 7  | 50467841  | C | T | IKZF1        | missense | 0.155 |
| P4 | 3  | 49899817  | G | T | CAMKV        | missense | 0.154 |
| P4 | 16 | 20559766  | C | A | ACSM2B       | missense | 0.154 |
| P4 | 3  | 98073458  | G | C | OR5K4        | missense | 0.152 |
| P4 | 5  | 140915627 | A | G | DIAPH1       | missense | 0.152 |
| P4 | 14 | 51444072  | C | A | TRIM9        | splicing | 0.151 |
| P4 | 5  | 81548378  | C | G | ATG10        | splicing | 0.15  |
| P4 | 2  | 21233594  | G | A | APOB         | missense | 0.149 |
| P4 | 2  | 69298895  | C | A | ANTXR1       | missense | 0.149 |
| P4 | 2  | 21236277  | T | A | APOB         | missense | 0.148 |
| P4 | 7  | 82997325  | C | A | SEMA3E       | missense | 0.148 |
| P4 | 19 | 16630960  | G | A | CHERP        | missense | 0.148 |

|    |    |             |   |         |          |       |
|----|----|-------------|---|---------|----------|-------|
| P4 | 10 | 71010389 G  | T | HKDC1   | missense | 0.147 |
| P4 | 12 | 104995723 G | T | CHST11  | missense | 0.147 |
| P4 | 16 | 8890363 G   | T | TMEM186 | missense | 0.147 |
| P4 | 3  | 48626351 C  | T | COL7A1  | missense | 0.146 |
| P4 | 19 | 6735687 T   | G | GPR108  | missense | 0.146 |
| P4 | 1  | 197073763 C | A | ASPM    | missense | 0.145 |
| P4 | 2  | 179582777 G | A | TTN     | missense | 0.145 |
| P4 | 12 | 58112157 G  | T | OS9     | stopgain | 0.145 |
| P4 | 12 | 121093947 G | C | CABP1   | missense | 0.145 |
| P4 | 20 | 17928219 C  | A | SNX5    | missense | 0.145 |
| P4 | X  | 18779691 C  | G | PPEF1   | stopgain | 0.145 |
| P4 | 1  | 79387388 A  | T | ELTD1   | stopgain | 0.144 |
| P4 | 3  | 183824021 C | A | HTR3E   | missense | 0.144 |
| P4 | 4  | 102117094 C | A | PPP3CA  | missense | 0.144 |
| P4 | 7  | 107194733 C | T | COG5    | missense | 0.144 |
| P4 | 12 | 9333680 G   | T | PZP     | missense | 0.144 |
| P4 | 2  | 108881411 C | G | SULT1C3 | missense | 0.143 |
| P4 | 3  | 134968233 G | A | EPHB1   | missense | 0.143 |
| P4 | 4  | 79353711 G  | T | FRAS1   | missense | 0.143 |
| P4 | 17 | 35836906 G  | T | TADA2A  | missense | 0.143 |
| P4 | 16 | 28847579 G  | T | ATXN2L  | missense | 0.142 |
| P4 | 4  | 114179501 C | A | ANK2    | missense | 0.14  |
| P4 | 7  | 26678782 G  | T | C7orf71 | missense | 0.14  |
| P4 | 19 | 58455429 C  | A | ZNF256  | splicing | 0.14  |
| P4 | 5  | 169310815 G | C | FAM196B | missense | 0.139 |
| P4 | 9  | 115941082 C | A | FKBP15  | splicing | 0.139 |
| P4 | 1  | 175323555 G | T | TNR     | missense | 0.137 |
| P4 | 6  | 32017971 C  | A | TNXB    | missense | 0.137 |
| P4 | 9  | 107457732 T | A | OR13D1  | missense | 0.137 |
| P4 | 14 | 31598297 A  | G | HECTD1  | missense | 0.137 |
| P4 | 16 | 28847578 G  | T | ATXN2L  | missense | 0.137 |
| P4 | 1  | 44083182 C  | T | PTPRF   | missense | 0.136 |
| P4 | 4  | 114280153 C | A | ANK2    | missense | 0.136 |
| P4 | 6  | 133827283 G | A | EYA4    | missense | 0.136 |
| P4 | 7  | 82997324 C  | A | SEMA3E  | missense | 0.136 |
| P4 | 19 | 12383307 T  | C | ZNF44   | missense | 0.136 |
| P4 | 8  | 139839024 C | G | COL22A1 | missense | 0.135 |
| P4 | 13 | 23912470 C  | T | SACS    | missense | 0.135 |

|    |    |           |   |   |          |          |       |
|----|----|-----------|---|---|----------|----------|-------|
| P4 | 4  | 101947157 | G | T | PPP3CA   | missense | 0.134 |
| P4 | 19 | 57803236  | A | G | ZNF460   | missense | 0.134 |
| P4 | 14 | 32319373  | A | T | NUBPL    | missense | 0.133 |
| P4 | 5  | 1420743   | C | T | SLC6A3   | missense | 0.132 |
| P4 | 3  | 130287026 | A | G | COL6A6   | missense | 0.131 |
| P4 | 1  | 150525650 | C | T | ADAMTSL4 | missense | 0.129 |
| P4 | 2  | 186673571 | C | A | FSIP2    | missense | 0.129 |
| P4 | 5  | 89971103  | C | A | GPR98    | missense | 0.129 |
| P4 | 11 | 94759176  | G | C | KDM4E    | missense | 0.129 |
| P4 | 18 | 48723066  | C | G | MEX3C    | missense | 0.129 |
| P4 | 22 | 39176982  | C | A | DNAL4    | missense | 0.129 |
| P4 | 4  | 115997215 | C | A | NDST4    | missense | 0.128 |
| P4 | 1  | 66102467  | G | T | LEPR     | missense | 0.127 |
| P4 | 10 | 63195999  | G | T | TMEM26   | missense | 0.127 |
| P4 | 12 | 8612189   | A | G | CLEC6A   | splicing | 0.126 |
| P4 | 20 | 44588926  | C | A | ZNF335   | missense | 0.126 |
| P4 | 2  | 219893108 | C | A | CCDC108  | missense | 0.125 |
| P4 | 3  | 164764675 | C | T | SI       | stopgain | 0.125 |
| P4 | 19 | 2249596   | A | G | AMH      | missense | 0.125 |
| P4 | 5  | 13751184  | C | A | DNAH5    | splicing | 0.124 |
| P4 | 17 | 41062957  | C | T | G6PC     | missense | 0.124 |
| P4 | 6  | 29364592  | G | A | OR12D2   | missense | 0.122 |
| P4 | 6  | 102069820 | C | G | GRIK2    | splicing | 0.122 |
| P4 | 8  | 91937824  | C | G | NECAB1   | missense | 0.122 |
| P4 | 20 | 62597524  | C | A | ZNF512B  | missense | 0.122 |
| P4 | 6  | 152651158 | C | A | SYNE1    | missense | 0.121 |
| P4 | 17 | 74073460  | C | A | GALR2    | missense | 0.121 |
| P4 | 6  | 29323678  | C | T | OR5V1    | missense | 0.12  |
| P4 | 6  | 138196843 | G | T | TNFAIP3  | missense | 0.12  |
| P4 | 3  | 98251665  | T | G | GPR15    | missense | 0.119 |
| P4 | 7  | 158695178 | C | A | WDR60    | missense | 0.119 |
| P4 | 9  | 112005908 | G | T | EPB41L4B | missense | 0.119 |
| P4 | 16 | 24580323  | G | T | RBBP6    | missense | 0.118 |
| P4 | 16 | 67684015  | C | T | RLTPR    | missense | 0.118 |
| P4 | 22 | 39482374  | G | T | APOBEC3G | missense | 0.118 |
| P4 | 11 | 5067775   | G | T | OR52J3   | missense | 0.117 |
| P4 | 13 | 58207879  | G | T | PCDH17   | missense | 0.117 |
| P4 | 11 | 73076586  | C | T | ARHGEF17 | missense | 0.116 |



|    |    |           |   |   |           |          |       |
|----|----|-----------|---|---|-----------|----------|-------|
| P4 | 2  | 234628242 | G | T | UGT1A4    | missense | 0.115 |
| P4 | 10 | 125447646 | C | A | GPR26     | missense | 0.115 |
| P4 | 1  | 78034124  | T | A | ZZZ3      | missense | 0.114 |
| P4 | 1  | 155172652 | C | T | THBS3     | missense | 0.114 |
| P4 | 1  | 182841590 | C | T | DHX9      | missense | 0.114 |
| P4 | 3  | 1414588   | G | T | CNTN6     | missense | 0.114 |
| P4 | 5  | 9202278   | C | A | SEMA5A    | missense | 0.114 |
| P4 | 6  | 111672966 | C | G | REV3L     | missense | 0.114 |
| P4 | 21 | 45711071  | C | T | AIRE      | missense | 0.114 |
| P4 | 5  | 79945871  | G | A | MTRNR2L2  | missense | 0.113 |
| P4 | 5  | 143586867 | G | A | KCTD16    | missense | 0.113 |
| P4 | 6  | 36298001  | C | T | C6orf222  | missense | 0.113 |
| P4 | 6  | 152768646 | C | A | SYNE1     | stopgain | 0.113 |
| P4 | 8  | 24259537  | A | T | ADAMDEC1  | missense | 0.113 |
| P4 | 17 | 7357826   | T | G | CHRNB1    | missense | 0.113 |
| P4 | 1  | 75862291  | G | A | SLC44A5   | missense | 0.111 |
| P4 | 8  | 90802450  | G | T | RIPK2     | missense | 0.111 |
| P4 | 9  | 27017051  | G | T | IFT74     | splicing | 0.111 |
| P4 | 11 | 17438476  | C | T | ABCC8     | splicing | 0.111 |
| P4 | 16 | 2278477   | G | A | E4F1      | missense | 0.111 |
| P4 | 5  | 140564388 | G | A | PCDHB16   | missense | 0.11  |
| P4 | 6  | 110098224 | A | T | FIG4      | missense | 0.11  |
| P4 | 9  | 107513294 | C | T | NIPSNAP3A | missense | 0.11  |
| P4 | 11 | 123847548 | C | A | OR10S1    | missense | 0.11  |
| P4 | 14 | 33292965  | G | T | AKAP6     | missense | 0.11  |
| P4 | 2  | 186656208 | G | A | FSIP2     | missense | 0.109 |
| P4 | 5  | 21752099  | G | T | CDH12     | missense | 0.109 |
| P4 | 6  | 46190962  | C | A | RCAN2     | missense | 0.109 |
| P4 | 6  | 160431743 | A | T | IGF2R     | missense | 0.109 |
| P4 | X  | 19369445  | A | C | PDHA1     | missense | 0.109 |
| P4 | 11 | 6023510   | G | T | OR56A4    | missense | 0.107 |
| P4 | 11 | 55606597  | C | A | OR5D16    | missense | 0.106 |
| P4 | 6  | 132643859 | G | A | MOXD1     | stopgain | 0.105 |
| P4 | 11 | 47644320  | C | T | MTCH2     | missense | 0.105 |
| P4 | 1  | 111147335 | C | T | KCNA2     | missense | 0.104 |
| P4 | 2  | 119751983 | G | A | MARCO     | missense | 0.104 |
| P4 | 10 | 82264535  | G | A | TSPAN14   | splicing | 0.104 |
| P4 | 17 | 45234343  | T | G | CDC27     | missense | 0.104 |

|    |    |           |   |   |           |          |       |
|----|----|-----------|---|---|-----------|----------|-------|
| P4 | 1  | 196288612 | A | G | KCNT2     | splicing | 0.103 |
| P4 | 4  | 71889373  | G | T | DCK       | missense | 0.103 |
| P4 | 7  | 127894748 | G | T | LEP       | missense | 0.103 |
| P4 | 8  | 105456647 | C | G | DPYS      | missense | 0.103 |
| P4 | 9  | 96214846  | A | G | FAM120AOS | missense | 0.103 |
| P4 | 19 | 59068097  | G | C | UBE2M     | missense | 0.103 |
| P4 | 6  | 35471532  | C | G | TULP1     | missense | 0.102 |
| P4 | 7  | 94539941  | G | T | PPP1R9A   | missense | 0.102 |
| P4 | 12 | 109604776 | G | T | ACACB     | missense | 0.102 |
| P4 | 11 | 93778916  | C | A | HEPHL1    | missense | 0.101 |
| P4 | X  | 53634512  | G | C | HUWE1     | missense | 0.101 |
| P4 | 6  | 155450723 | G | C | TIAM2     | missense | 0.1   |
| P4 | 9  | 37740723  | C | G | FRMPD1    | missense | 0.1   |
| P4 | 9  | 116346655 | G | A | RGS3      | missense | 0.1   |
| P4 | 12 | 85257381  | C | A | SLC6A15   | splicing | 0.1   |
| P4 | 16 | 723526    | G | T | RHOT2     | missense | 0.1   |
| P4 | 17 | 45234360  | A | C | CDC27     | stopgain | 0.1   |
| P4 | 22 | 22842187  | C | T | ZNF280B   | missense | 0.1   |
| P4 | 1  | 117297274 | C | A | CD2       | missense | 0.099 |
| P4 | 1  | 176175826 | C | G | RFWD2     | missense | 0.098 |
| P4 | 3  | 74351839  | A | T | CNTN3     | splicing | 0.098 |
| P4 | 3  | 142243040 | T | A | ATR       | missense | 0.098 |
| P4 | 4  | 70802172  | A | T | CSN1S1    | splicing | 0.098 |
| P4 | 17 | 7577541   | T | A | TP53      | missense | 0.098 |
| P4 | 19 | 51133376  | C | A | SYT3      | missense | 0.098 |
| P4 | 1  | 152058786 | C | T | TCHHL1    | missense | 0.097 |
| P4 | 3  | 107096583 | C | G | CCDC54    | missense | 0.097 |
| P4 | 12 | 80663902  | T | A | OTOGL     | missense | 0.097 |
| P4 | 2  | 211473189 | T | A | CPS1      | missense | 0.096 |
| P4 | 8  | 80567271  | G | T | STMN2     | missense | 0.096 |
| P4 | 11 | 58034708  | G | A | OR10W1    | missense | 0.096 |
| P4 | 1  | 233225841 | C | G | PCNXL2    | missense | 0.095 |
| P4 | 3  | 154857987 | C | T | MME       | missense | 0.095 |
| P4 | 7  | 117864990 | G | T | ANKRD7    | missense | 0.095 |
| P4 | 7  | 129919438 | A | G | CPA2      | missense | 0.095 |
| P4 | 8  | 113275980 | G | T | CSMD3     | missense | 0.095 |
| P4 | 9  | 2039826   | C | A | SMARCA2   | missense | 0.095 |
| P4 | 14 | 32561694  | G | T | ARHGAP5   | missense | 0.095 |

|    |    |           |   |   |          |          |       |
|----|----|-----------|---|---|----------|----------|-------|
| P4 | 21 | 18976514  | G | A | BTG3     | missense | 0.095 |
| P4 | 5  | 169310157 | G | T | FAM196B  | missense | 0.094 |
| P4 | 8  | 26366164  | C | A | PNMA2    | missense | 0.094 |
| P4 | 19 | 42720857  | G | C | DEDD2    | missense | 0.094 |
| P4 | 4  | 81967450  | G | A | BMP3     | missense | 0.093 |
| P4 | 4  | 114274446 | G | A | ANK2     | missense | 0.093 |
| P4 | 11 | 5968666   | G | T | OR56A3   | missense | 0.093 |
| P4 | 5  | 13865967  | C | T | DNAH5    | missense | 0.092 |
| P4 | 8  | 113347585 | T | C | CSMD3    | missense | 0.092 |
| P4 | 11 | 59857200  | A | T | MS4A2    | missense | 0.092 |
| P4 | 1  | 152324372 | G | C | FLG2     | missense | 0.091 |
| P4 | 5  | 24535848  | G | A | CDH10    | stopgain | 0.091 |
| P4 | 7  | 70853319  | G | A | WBSCR17  | missense | 0.091 |
| P4 | 19 | 21720870  | G | A | ZNF429   | missense | 0.091 |
| P4 | 21 | 45953648  | A | T | TSPEAR   | missense | 0.091 |
| P4 | 5  | 169472902 | A | T | DOCK2    | missense | 0.09  |
| P4 | 8  | 113299291 | A | T | CSMD3    | splicing | 0.09  |
| P4 | 20 | 31623433  | G | T | BPIFB6   | missense | 0.09  |
| P4 | 5  | 33630991  | G | A | ADAMTS12 | missense | 0.089 |
| P4 | 7  | 71177001  | A | T | WBSCR17  | splicing | 0.089 |
| P4 | 8  | 105502998 | C | A | LRP12    | missense | 0.089 |
| P4 | 15 | 67713676  | A | G | IQCH     | missense | 0.089 |
| P4 | 19 | 6442126   | G | T | SLC25A23 | missense | 0.089 |
| P4 | 1  | 222801569 | G | T | MIA3     | missense | 0.088 |
| P4 | 10 | 51829323  | A | G | FAM21A   | missense | 0.088 |
| P4 | 11 | 59630103  | G | T | TCN1     | missense | 0.088 |
| P4 | 19 | 51960935  | C | A | SIGLEC8  | missense | 0.088 |
| P4 | 1  | 33778194  | G | A | A3GALT2  | splicing | 0.086 |
| P4 | 7  | 50742329  | C | A | GRB10    | missense | 0.086 |
| P4 | 11 | 55563940  | C | G | OR5D14   | missense | 0.086 |
| P4 | 16 | 20328663  | C | A | GP2      | stopgain | 0.086 |
| P4 | 22 | 38522427  | C | T | PLA2G6   | missense | 0.086 |
| P4 | 7  | 50607687  | G | A | DDC      | missense | 0.085 |
| P4 | 1  | 144917555 | C | A | PDE4DIP  | missense | 0.084 |
| P4 | 11 | 6007308   | G | T | OR52L1   | missense | 0.084 |
| P4 | 5  | 140769706 | T | A | PCDHGB4  | missense | 0.083 |
| P4 | 6  | 44223188  | C | T | SLC35B2  | missense | 0.083 |
| P4 | 9  | 79635001  | C | A | FOXB2    | missense | 0.083 |

|    |    |             |   |         |          |       |
|----|----|-------------|---|---------|----------|-------|
| P4 | 3  | 52519844 G  | A | NISCH   | splicing | 0.082 |
| P4 | 5  | 179264731 T | C | C5orf45 | missense | 0.082 |
| P4 | 7  | 48317837 G  | C | ABCA13  | missense | 0.082 |
| P4 | 19 | 2433903 G   | A | LMNB2   | missense | 0.082 |
| P4 | 3  | 147131304 C | G | ZIC1    | missense | 0.081 |
| P4 | 11 | 56954919 C  | A | LRRC55  | missense | 0.081 |
| P4 | 17 | 5378110 C   | A | DERL2   | splicing | 0.081 |
| P4 | 19 | 39001205 G  | T | RYR1    | missense | 0.08  |

---

Table S2. The SNVs existed only in post-chemotherapy samples

| Patient | Chromosome | Position  | Ref | Alt | GeneName | Mutation type | VAF   |
|---------|------------|-----------|-----|-----|----------|---------------|-------|
| P1      | 5          | 69328169  | G   | T   | SERF1A   | missense      | 0.9   |
| P1      | 21         | 33976452  | C   | A   | C21orf59 | missense      | 0.744 |
| P1      | 1          | 26349624  | C   | A   | EXTL1    | missense      | 0.738 |
| P1      | 13         | 39540971  | A   | C   | STOML3   | missense      | 0.735 |
| P1      | 17         | 4060359   | T   | A   | CYB5D2   | missense      | 0.714 |
| P1      | 19         | 17994798  | C   | T   | SLC5A5   | missense      | 0.709 |
| P1      | 17         | 10296222  | G   | A   | MYH8     | stopgain      | 0.675 |
| P1      | X          | 119513343 | C   | T   | ATP1B4   | missense      | 0.66  |
| P1      | 6          | 41121522  | C   | T   | TREML1   | missense      | 0.623 |
| P1      | 15         | 84683476  | G   | T   | ADAMTSL3 | stopgain      | 0.577 |
| P1      | 3          | 59032983  | A   | G   | C3orf67  | splicing      | 0.569 |
| P1      | 15         | 29346789  | G   | C   | APBA2    | missense      | 0.547 |
| P1      | 7          | 94879441  | A   | G   | PPP1R9A  | missense      | 0.525 |
| P1      | 1          | 240371405 | C   | A   | FMN2     | missense      | 0.5   |
| P1      | 2          | 220047289 | G   | T   | FAM134A  | missense      | 0.485 |
| P1      | 18         | 7013887   | G   | A   | LAMA1    | missense      | 0.482 |
| P1      | 17         | 34171796  | G   | A   | TAF15    | missense      | 0.463 |
| P1      | 14         | 71492998  | A   | T   | PCNX     | missense      | 0.457 |
| P1      | 1          | 109517188 | C   | T   | WDR47    | missense      | 0.438 |
| P1      | 18         | 163358    | G   | C   | USP14    | missense      | 0.417 |
| P1      | 19         | 55418081  | C   | T   | NCR1     | missense      | 0.412 |
| P1      | 7          | 23293786  | A   | G   | GPNMB    | splicing      | 0.411 |
| P1      | 10         | 134010539 | C   | A   | DPYSL4   | missense      | 0.411 |
| P1      | 20         | 60899232  | T   | A   | LAMA5    | missense      | 0.4   |
| P1      | 9          | 135866303 | C   | T   | GFI1B    | stopgain      | 0.396 |
| P1      | 1          | 166890374 | C   | T   | ILDR2    | missense      | 0.387 |
| P1      | 17         | 72356219  | C   | G   | BTBD17   | missense      | 0.382 |
| P1      | 7          | 30961691  | G   | T   | AQP1     | missense      | 0.372 |
| P1      | 16         | 30566619  | G   | A   | ZNF764   | missense      | 0.372 |
| P1      | 12         | 11420480  | T   | G   | PRB3     | missense      | 0.368 |
| P1      | 12         | 115114176 | G   | C   | TBX3     | missense      | 0.368 |
| P1      | 2          | 26798831  | C   | T   | C2orf70  | missense      | 0.366 |
| P1      | 12         | 114377845 | C   | G   | RBM19    | missense      | 0.364 |
| P1      | 12         | 85515608  | A   | T   | LRRIQ1   | missense      | 0.362 |
| P1      | 10         | 63170363  | A   | G   | TMEM26   | missense      | 0.361 |
| P1      | 15         | 72190527  | G   | C   | MYO9A    | missense      | 0.358 |

|    |    |             |   |                     |          |       |
|----|----|-------------|---|---------------------|----------|-------|
| P1 | 7  | 751114 T    | A | PRKAR1B             | missense | 0.351 |
| P1 | 16 | 50745956 G  | T | NOD2                | missense | 0.339 |
| P1 | 22 | 38519207 G  | T | PLA2G6              | missense | 0.337 |
| P1 | 10 | 50960179 C  | A | OGDHL               | missense | 0.327 |
| P1 | 3  | 133191199 T | A | BFSP2               | missense | 0.326 |
| P1 | 14 | 75374227 A  | G | RPS6KL1             | missense | 0.325 |
| P1 | 12 | 131589418 G | C | GPR133              | missense | 0.323 |
| P1 | 1  | 46685542 C  | T | LURAP1              | stopgain | 0.316 |
| P1 | 20 | 23030108 G  | C | THBD                | missense | 0.31  |
| P1 | 15 | 52188623 C  | T | TMOD3               | missense | 0.302 |
| P1 | 12 | 2791123 C   | T | CACNA1C             | missense | 0.3   |
| P1 | 22 | 30200635 C  | T | ASCC2               | missense | 0.295 |
| P1 | 5  | 1036383 C   | T | NKD2                | missense | 0.288 |
| P1 | 1  | 161094319 G | C | DEDD                | splicing | 0.286 |
| P1 | 5  | 1432592 C   | T | SLC6A3              | missense | 0.278 |
| P1 | 16 | 24566932 A  | G | RBBP6               | splicing | 0.276 |
| P1 | 5  | 32098738 T  | G | PDZD2               | missense | 0.241 |
| P1 | 11 | 4929123 C   | G | OR51A7              | missense | 0.202 |
| P1 | 3  | 89499366 C  | A | EPHA3               | missense | 0.197 |
| P1 | 9  | 67968525 T  | C | ANKRD20A1,ANKRD20A3 | missense | 0.18  |
| P1 | 3  | 52325942 T  | G | GLYCTK              | splicing | 0.129 |
| P1 | 3  | 189456474 G | C | TP63                | missense | 0.127 |
| P1 | 6  | 166755912 C | A | SFT2D1              | missense | 0.126 |
| P1 | 19 | 54745481 G  | T | LILRA6,LILRB3       | missense | 0.113 |
| P1 | 11 | 76062520 T  | A | PRKRIR              | missense | 0.108 |
| P1 | 22 | 38120965 T  | C | TRIOBP              | missense | 0.087 |
| P1 | 6  | 146276273 C | A | SHPRH               | missense | 0.086 |
| P1 | 11 | 76062552 T  | G | PRKRIR              | missense | 0.086 |
| P1 | 4  | 183657999 G | C | TENM3               | missense | 0.083 |
| P1 | 11 | 63141271 G  | T | SLC22A9             | splicing | 0.083 |
| P1 | 22 | 17688161 A  | C | CECR1               | missense | 0.082 |
| P1 | 17 | 34797679 T  | G | TBC1D3G             | missense | 0.08  |
| P1 | 1  | 36785910 A  | T | SH3D21              | missense | 0.079 |
| P1 | 2  | 223793627 G | C | ACSL3               | missense | 0.078 |
| P1 | 15 | 91420753 G  | A | FURIN               | splicing | 0.067 |
| P1 | 8  | 24813495 C  | T | NEFL                | missense | 0.064 |
| P1 | 12 | 112744010 T | C | HECTD4              | missense | 0.062 |
| P1 | 20 | 61463524 G  | T | COL9A3              | missense | 0.058 |

|    |    |             |   |                             |          |       |
|----|----|-------------|---|-----------------------------|----------|-------|
| P1 | 22 | 16279194 C  | T | POTEH                       | splicing | 0.058 |
| P1 | 5  | 179201506 G | T | MAML1                       | missense | 0.055 |
| P1 | 13 | 43839593 G  | A | ENOX1                       | splicing | 0.051 |
| P1 | 4  | 91230330 A  | T | CCSER1                      | missense | 0.046 |
| P1 | X  | 32613906 G  | A | DMD                         | missense | 0.043 |
| P1 | 5  | 24487788 C  | A | CDH10                       | missense | 0.034 |
| P1 | 11 | 63586345 A  | G | C11orf84                    | missense | 0.028 |
| P2 | 22 | 41222580 T  | G | ST13                        | exonic   | 0.325 |
| P2 | 1  | 148252841 G | A | NBPF14                      | splicing | 0.159 |
| P2 | 16 | 29831052 T  | G | PAGR1                       | exonic   | 0.127 |
| P2 | 7  | 86522420 T  | A | KIAA1324L                   | splicing | 0.068 |
| P2 | X  | 45013241 A  | G | CXorf36                     | exonic   | 0.045 |
| P3 | X  | 150908168 G | A | CNGA2                       | missense | 0.143 |
| P3 | 16 | 2229720 C   | T | CASKIN1                     | stopgain | 0.138 |
| P3 | Y  | 15417937 C  | G | UTY                         | missense | 0.137 |
| P3 | 3  | 195514441 G | T | MUC4                        | missense | 0.108 |
| P3 | 10 | 28272833 T  | C | ARMC4                       | missense | 0.106 |
| P3 | 17 | 48774331 G  | C | ANKRD40                     | missense | 0.106 |
| P3 | 6  | 117884508 C | G | GOPC                        | missense | 0.1   |
| P3 | Y  | 24052528 A  | T | RBMY1B,RBMY1D,RBMY1E        | missense | 0.097 |
| P3 | 12 | 96104273 G  | T | NTN4                        | missense | 0.095 |
| P3 | 8  | 87126069 C  | G | ATP6V0D2                    | missense | 0.094 |
| P3 | 15 | 95013594 C  | G | MCTP2                       | missense | 0.092 |
| P3 | 4  | 140297578 G | C | NAA15                       | missense | 0.088 |
| P3 | 21 | 11097574 T  | A | BAGE3,BAGE5,BAGE2,BAGE4,BAG | missense | 0.085 |
| P3 | 4  | 118006025 G | T | TRAM1L1                     | missense | 0.082 |
| P3 | 12 | 95694012 G  | A | VEZT                        | missense | 0.081 |
